# Supplementary material for: Genetic architecture of subcortical brain structures in 38,851 individuals
Source: Springer Nature journal article supplement (doi:10.1038/s41588-019-0511-y), 2019-10-21
Supplement: MOESM3 [file 41588_2019_511_MOESM3_ESM.xlsx]

## Sheet: Index
Table	Contents
Supplementary Table 1	Sample size contribution per subcortical structure
Supplementary Table 2	Characteristics for study samples
Supplementary Table 3	Summary statistics for subcortical brain volumes in CHARGE study samples
Supplementary Table 4	Heritability estimates
Supplementary Table 5	Image acquisition and processing for study sample
Supplementary Table 6	Genotyping and quality control for study samples
Supplementary Table 7	Association of index SNPs with the volumes of all subcortical brain structures in the discovery and generalization samples and combined meta-analysis
Supplementary Table 8	Binomial sign test of concordance for the direction of effect across ethnic groups
Supplementary Table 9	Association between index SNPs and expression QTL in autopsied brains from the ROSMAP sample
Supplementary Table 10	Association between index SNPs and expression QTL in diverse tissues queried in private databases
Supplementary Table 11	Association between index SNPs and cis expression QTL in diverse tissues queried in GTEx
Supplementary Table 12	Association between index SNPs and methylation QTLs in autopsied brains from the ROSMAP sample
Supplementary Table 13	Description of genes influencing the volume of subcortical structures
Supplementary Table 14	Association of index SNPs with cognitive function and presence of neuropathological features in autopsied brains from the ROSMAP sample
Supplementary Table 15	Associations for the expression of genes influencing subcortical brain volumes with cognitive function and presence of neuropathological features in autopsied brains from the ROSMAP sample
Supplementary Table 16	Partial phenotypic correlationsa among the volumes of subcortical structures
Supplementary Table 17	Genetic correlations among the volumes of subcortical structures and with other anthropometric and neuropsychiatric traits
Supplementary Table 18	Candidate genes with Drosophila homologs known to cause "neuroanatomy defective" phenotypes
Supplementary Table 19	Enrichment for genes causing defective "neuroanatomy defective" phenotypes in Drosophila
Supplementary Table 20	Partitioning heritability by functional annotation categories
Supplementary Table 21	STRING protein–protein interaction (PPI) networks enriched by 158 genes influencing the volumes of subcortical structures

## Sheet: Supplementary Table 1
Supplementary Table 1. Sample size contribution per subcortical structure
Stage	Study samples		Nucleus accumbens	Amygdala	Brainstem	Caudate nucleus	Globus pallidus	Putamen	Thalamus
Discovery sample (European)	CHARGE: 3C-Dijon, AGES-Reykjavik, ARIC (EU), ASPS-Fam, CHS (EU), ERF, FHS-1, FHS-2, LBC1936, LIFE-Adult, ROSMAP, RSI, RSII, RSIII	14	11138	12959	12586	16258	12959	16114	12959
	ENIGMA: ADNI, ADNI2GO, ALSPAC, ANM, Betula, BFS, BIG, BrainSCALE, BRCDECC, EPIGEN, GIG, GSP, HUBIN, HUNT, IMAGEN, IMpACT, LIBD, MCIC, MooDS, MPIP, NCNG, NESDA, neuroIMAGE, NTR, OATS, PAFIP, QTIM, SHIP, SHIP-TREND, Sydney MAS, TOP, UMCU, UMCU-UCLA	33	13112	13160	7911	13171	13142	13145	13193
	UKBB	1	8312	8312	8312	8312	8312	8312	8312
Generalization (African-American)	ARIC (AA), CHS (AA), GeneSTAR	3	85	769	85	769	769	769	769
Generalization (Asian)	EDIS-SCES, EDIS-SIMES	2	341	341	341	341	341	341	341
Combined sample		53	32988	35541	29235	38851	35523	38681	35574

## Sheet: Supplementary Table 2
Supplementary Table 2. Characteristics for study samples
Study sample	Analysis	Study design	Ancestry	Total N	Age (years), mean (SD)	Age range (years)	Women, %
3C-Dijon	DISCOVERY (CHARGE)	Population-based	European	1397	72.2 (4.1)	65 - 82	63
ADNI	DISCOVERY (ENIGMA)	Case-Control (AD, MCI, healthy control)	European	747	75.4 (6.9)	55 - 91	40.4284
ADNI2GO	DISCOVERY (ENIGMA)	Case-Control (AD, MCI, healthy control)	European	362	72.8 (7.4)	55 - 91	56.0773
AGES-Reykjavik	DISCOVERY (CHARGE)	Population-based	European	2403	75.85 (5.3)	66 - 95	59.57
ALSPAC	DISCOVERY (ENIGMA)	Population-based	European	405	19.60 (0.9)	18 - 21	0
ANM	DISCOVERY (ENIGMA)	Case-control (AD, MCI and health controls)	European	357	74.4 (6.4)	53 - 90	57.1429
ARIC (AA)	GENERALIZATION (AFR)	Population-based	African American	413	71.7 (4.4)	61 - 82	61.2591
ARIC (EU)	DISCOVERY (CHARGE)	Population-based	European	424	72.6 (4.3)	62 - 82	60.8491
ASPS-Fam	DISCOVERY (CHARGE)	Population-based	European	305	64.5 (10.5)	38 - 84	61
Betula	DISCOVERY (ENIGMA)	Population-based	European	353	62.3 (13.3)	25 - 95	52.4079
BFS	DISCOVERY (ENIGMA)	Population-based	European	220	24 (7.9)	15 - 60	52.2727
BIG	DISCOVERY (ENIGMA)	Population-based	European	1300	22.9 (3.8)	18 - 41	57.4615
BrainSCALE	DISCOVERY (ENIGMA)	Population-based Twin Study	European	277	10.0 (1.3)	9 - 15	53.0686
BRCDECC	DISCOVERY (ENIGMA)	Case-control (MDD and healthy controls)	European	169	49.9 (8.6)	26 - 71	62.1302
CHS (AA)	GENERALIZATION (AFR)	Population-based	African American	85	76.7 (4.2)	70 -89	58
CHS (EU)	DISCOVERY (CHARGE)	Population-based	European	567	78.55 (3.9)	73 - 95	60
EDIS-SCES	GENERALIZATION (ASN)	Population-based	Chinese	130	70.7 (6.2)	61 - 85	52.3
EDIS-SIMES	GENERALIZATION (ASN)	Population-based	Malay	211	70.5 (6.7)	60 - 85	52.6
EPIGEN	DISCOVERY (ENIGMA)	Epilepsy cases	European	233	38.5 (12.7)	14 - 85	59.2275
ERF	DISCOVERY (CHARGE)	Family-based study	European	118	64.3 (4.5)	55 - 76	50.8475
FHS-1	DISCOVERY (CHARGE)	Population-based	European	896	64.5 (8.1)	41 - 93	57.25
FHS-2	DISCOVERY (CHARGE)	Population-based	European	3303	57.2 (14.5)	25 - 96	53
GeneSTAR (AA)	GENERALIZATION (AFR)	Family-based study	African American	271	51.4 (10.8)	29 - 72	65
GIG	DISCOVERY (ENIGMA)	Population-based	European	299	24.2 (2.4)	19 - 31	59.8662
GSP	DISCOVERY (ENIGMA)	Population-based	European	442	21.4 (3.2)	18 - 35	56.7873
HUBIN	DISCOVERY (ENIGMA)	Case-control (SCZ and healthy controls)	European	200	41.8 (8.1)	19 - 56	35
HUNT	DISCOVERY (ENIGMA)	Population-based	European	919	59.2 (4.2)	50 - 67	53
IMAGEN	DISCOVERY (ENIGMA)	Population-based	European	1765	14.6 (0.4)	13 - 17	50.7082
IMpACT	DISCOVERY (ENIGMA)	Case-control (ADHD and healthy controls)	European	204	36.9 (11.0)	18 - 63	59.3137
LBC1936	DISCOVERY (CHARGE)	Population-based	European	512	72.7 (0.72)	71 - 74	50.2
LIBD	DISCOVERY (ENIGMA)	Case-Control (SCZ, healthy control)	European	481	33.2 (10.2)	18 - 61	44.6985
LIFE-Adult	DISCOVERY (CHARGE)	Population-based	European	1718	62.8 (11.4)	20 - 82	49
MCIC	DISCOVERY (ENIGMA)	Case-control (SCZ and healthy controls)	European	170	34.0 (11.2)	18 - 60	34.1176
MooDS	DISCOVERY (ENIGMA)	Population-based	European	311	33.4 (9.8)	18 - 51	52.7331
MPIP	DISCOVERY (ENIGMA)	Case-control (MDD and healthy controls)	European	550	48.3 (13.3)	18 - 87	57.8182
NCNG	DISCOVERY (ENIGMA)	Population-based	European	327	51.8 (16.7)	19 - 79	68.1957
NESDA	DISCOVERY (ENIGMA)	Case-control (Depression, Anxiety, and healthy controls)	European	231	37.8 (10.1)	18 - 57	66.2338
neuroIMAGE	DISCOVERY (ENIGMA)	ADHD cases	European	154	17.0 (2.5)	11 - 24	14.9351
NTR	DISCOVERY (ENIGMA)	Population-based Twin Study	European	400	29.7 (10.7)	12 - 56	59.5
OATS	DISCOVERY (ENIGMA)	Population-based Twin study	European	364	70.5 (5.1)	65 - 89	65.3846
PAFIP	DISCOVERY (ENIGMA)	Case-control (SCZ and healthy controls)	European	117	28.4 (8.1)	16 - 51	38.4615
QTIM	DISCOVERY (ENIGMA)	Population-based Twin Study	European	845	22.5 (3.2)	16 - 30	62.3669
ROSMAP	DISCOVERY (CHARGE)	Population-based	European	161	83.8 (6.2)	67 - 98	72.67
RSI	DISCOVERY (CHARGE)	Population-based	European	972	78.9 (5.0)	68 - 96	58
RSII	DISCOVERY (CHARGE)	Population-based	European	1058	69.4 (6.1)	60 - 97	53
RSIII	DISCOVERY (CHARGE)	Population-based	European	2429	57.0 (6.2)	45 - 89	56
SHIP	DISCOVERY (ENIGMA)	Population-based	European	966	56.4 (12.6)	31 - 90	52.4845
SHIP-TREND	DISCOVERY (ENIGMA)	Population-based	European	858	50.0 (13.5)	21 - 81	55.5944
Sydney MAS	DISCOVERY (ENIGMA)	Population-based	European	543	78.4 (4.7)	70 - 90	54.6961
TOP	DISCOVERY (ENIGMA)	Case-control (SCZ, BD, other psychoses, and healthy controls)	European	849	34.0 (10.4)	17 - 73	47.9388
UKBB	DISCOVERY	Population-based	European	8313	55.5 (7.4)	40 - 70	53																		40	-	70																53
UMCU	DISCOVERY (ENIGMA)	Case-control (SCZ and healthy controls)	European	279	31.9 (11.7)	17 - 68	26
UMCU-UCLA	DISCOVERY (ENIGMA)	Case-control (BP and healthy controls)	European	284	45.9 (14.3)	19 - 80	53

## Sheet: Supplementary Table 3
Supplementary Table 3. Summary statistics for subcortical brain volumes in CHARGE study samples
Study sample	Na	Brain volumes (cm³), mean (SD)
		Intracranial	Nucleus accumbens	Amygdala	Brainstem	Caudate nucleus	Globus pallidus	Putamen	Thalamus
3C-Dijon	1397	1358.07 (133.73)	NA	1.12 (0.13)	22.23 (2.33)	2.81 (0.35)	0.30 (0.11)	3.17 (0.46)	2.87 (0.35)
AGES-Reykjavik	2403	1497.27 (147.53)	0.54 (0.07)	2.45 (0.31)	27.91 (2.96)	3.61 (0.45)	1.14 (0.17)	4.80 (0.61)	7.55 (0.68)
ARIC (AA)	413	1401.80 (210.9)	NA	1.31 (0.19)	NA	3.14 (0.52)	1.39 (0.19)	4.24 (0.56)	6.31 (0.75)
ARIC (EU)	424	1551.20 (185.4)	NA	1.36 (0.17)	NA	3.25 (0.48)	1.39 (0.17)	4.20 (0.55)	6.29 (0.64)
ASPS-Fam	305	1429.14 (140.00)	0.47 (0.08)	1.57 (0.21)	20.90 (2.35)	3.16 (0.47)	1.55 (0.22)	4.50 (0.61)	6.70 (0.81)
CHS (AA)	85	1372.77 (149.52)	0.34 (0.07)	1.28 (0.18)	20.80 (2.41)	3.31 (0.51)	1.18 (0.17)	4.08 (0.60)	6.35 (0.65)
CHS (EU)	567	1436.32 (148.36)	0.34 (0.06)	1.31 (0.19)	20.60 (2.26)	3.47 (0.57)	1.22 (0.17)	4.17 (0.60)	6.33 (0.70)
EDIS-SCES	130	1092.48 (99.21)	0.45 (0.09)	1.37 (0.23)	20.08 (2.55)	3.28 (0.46)	1.61 (0.24)	4.78 (0.60)	5.64 (0.56)
EDIS-SIMES	211	1065.04 (110.19)	0.44 (0.10)	1.30 (0.23)	19.17 (2.25)	3.27 (0.52)	1.58 (0.23)	4.70 (0.67)	5.44 (0.56)
ERF	118	1452.17(185.23)	0.51 (0.08)	1.35 (0.19)	20.57 (2.24)	3.35 (0.60)	1.43 (0.22)	4.46 (0.56)	6.19 (0.65)
FHS-1	896	1217.97 (113.94)	0.46 (0.07)	1.44 (0.17)	21.99 (2.49)	3.15 (0.42)	1.49 (0.17)	4.48 (0.53)	6.82 (0.75)
FHS-2	3303	1253.00 (130.87)	NA	NA	NA	3.25 (0.60)	NA	5.24 (0.68)	NA
GeneSTAR	271	1540.57 (160.8)	NA	2.95 (0.73)	NA	4.01 (0.80)	3.03 (4.20)	3.85 (0.78)	5.17 (1.37)
LBC1936	512	1394.21 (148.06)	0.53 (0.09)	1.25 (0.21)	19.92 (2.26)	3.53 (0.58)	1.63 (0.23)	4.84 (0.72)	5.86 (0.57)
LIFE-Adult	1718	1461.90 (114.6)	0.44 (0.09)	1.51 (0.22)	20.11 (2.66)	3.42 (0.48)	1.35 (0.22)	4.74 (0.65)	6.64 (0.90)
ROSMAP	161	1572.00 (169.7)	0.39 (0.07)	1.19 (0.20)	20.11 (2.21)	3.42 (0.65)	1.31 (0.18)	NA	6.45 (0.86)
RSI	972	1449.31 (170.52)	0.49 (0.09)	1.27 (0.19)	20.00 (2.14)	3.55 (0.66)	1.31 (0.20)	4.27 (0.61)	5.76 (0.61)
RSII	1058	1467.12 (154.60)	0.52 (0.08)	1.35 (0.19)	20.59 (2.34)	3.43 (0.56)	1.45 (0.23)	4.48 (0.60)	6.15 (0.71)
RSIII	2429	1497.68 (156.05)	0.55 (0.08)	1.40 (0.18)	21.29 (2.28)	3.40 (0.45)	1.52 (0.22)	4.71 (0.59)	6.59 (0.74)
a Total available sample, numbers may differ per subcortical structure

## Sheet: Supplementary Table 4
Supplementary Table 4. Heritability estimatesa
Subcortical structure		Heritability from family-based studiesb								SNP-based heritability
		FHS (n=895)				ASPS-Fam (n=370)				Rotterdam (n=3,486)c				European sampled
		h²	SE	P-value		h²	SE	P-value		h²	SE	P-value		h²	SE	P-valuee
Nucleus accumbens		0.661195	0.134049	2.1e-06		0.663023	0.12434	4e-07		0.217177	0.099069	0.013477		0.191	0.0196	1.93974e-22
Amygdala		0.336606	0.145503	0.00931		0.589725	0.141299	1.49e-05		0.169844	0.099466	0.045245		0.0906	0.0166	4.81985e-08
Brainstem		0.860901	0.127408	4.92348e-09		0.787193	0.128269	2.59795e-08		0.451786	0.099176	1.3821e-06		0.3266	0.0297	3.96668e-28
Caudate nucleus		0.708985	0.13859	1.7e-06		0.854613	0.128964	3.12079e-10		0.36168	0.101035	0.00017169		0.2558	0.02	1.86474e-37
Globus pallidus		0.597271	0.131896	4.6e-06		0.55	0.138239	4.57e-05		0.397087	0.100152	2.5149e-05		0.1672	0.02	6.27183e-17
Putamen		0.792667	0.118806	5.38383e-10		0.706323	0.129717	1e-07		0.410989	0.099635	1.2343e-05		0.257	0.0221	2.93656e-31
Thalamus		0.538453	0.143222	0.0001157		0.470829	0.153604	0.001307		0.467551	0.101801	2.7739e-06		0.1786	0.019	5.45631e-21
a Models were adjusted for sex, age, age squared, total intracranial volume and population stratification
b Analysis performed with SOLAR
c Analysis performed with GCTA
d Analysis performed with LD score regression using uncorrected summary statistics from the combined European sample (nucleus accumbens = 32,562; amygdala = 34,431; brainstem = 28,809; caudate = 37,741; pallidum = 34,413; putamen = 37,571; thalamus = 34,464)
e Assuming z=h2/SE is distributed as N(0,1) for a one-tailed test
FHS = Framingham Heart Study sample 1; ASPS-Fam = Austrian Stroke Prevention Family Study

## Sheet: Supplementary Table 5
Supplementary Table 5. Image acquisition and processing for study sample
Study sample	MRI-scanner	Software	Acquisition	Reference (PMID)
3C-Dijon	1.5 T Siemens	SPM99	Scans were collected with 3D 1mm3 T1, 2D 1x1x3mm3 T2. They were processed with an automated and validated procedure based on Voxel-Based Morphometry (VBM) using SPM99, modified in 2 ways to take into account the aged brain: 1) using customized cerebral tissue templates specific to our database for both spatial normalization and tissue segmentation, and 2) refining the segmentation of the CSF due …	11771995; 15955500; 22305950
ADNI	1.5 T GE, Philips, and Siemens MRI scanners	FreeSurfer (4.0.1)	1.5T GE, Philips, and Siemens MRI scanners with a magnetization prepared rapid acquisition gradient echo (MPRAGE) sequence were used. Two high-resolution T1-weighted MRI scans were collected for each participant using a sagittal 3D MP-RAGE sequence with an approximate TR=2400ms, minimum full TE, approximate TI=1000ms, and approximate flip angle of 8 degrees. Scans were collected with a 24cm field…	19689234
ADNI2GO	3.0 T GE, Philips, and Siemens MRI scanners	FSL FIRST (4.1.9)	T1-weighted MP-RAGE (details at http://adni.loni.usc.edu/methods/documents/mri-protocols/)
AGES-Reykjavik	1.5 T Signa Twinspeed EXCITE system (GE Medical Systems, Waukesha, WI)	Custom image analysis pipeline, based on the MNI software.	MR images were acquired on a single research-dedicated 1.5 T Signa Twinspeed EXCITE system (GE Medical Systems, Waukesha, WI) using a multi-channel phased array head cap coil. The structural image protocol included a T1-weighted three dimensional spoiled gradient echo (3D-SPGR) sequence (TE (time to echo), 8 ms; TR (time repetition), 21 ms; FA (flip angle), 30°; FOV (field of view), 240 mm; matri…	22119006
ALSPAC	General Electric 3.0-T magnet (General Electric Medical Systems, Milwaukee, WI)	FreeSurfer (5.3.0)	T1-weighted images were acquired using the following parameters: 3D fast spoiled gradient echo scan with 180 oblique-axial slices, 1-mm isotropic resolution, TR-7.9 ms, TE=3.0 ms, TI=450ms and flip angle=20°.	26308966
ANM	1.5 T Siemens, 1.5 T GE at six sites	FreeSurfer (5.1.0)	Data acquisition for the AddNeuroMed study was designed to be compatible with that of ADNI. The imaging protocol for both studies included a high-resolution sagittal 3D T1-weighted MPRAGE volume (voxel size 1.1 × 1.1 × 1.2 mm3) and axial proton density/T2-weighted fast spin echo images. The MPRAGE volume was acquired using a customized pulse sequence specifically designed for the ADNI study to en…	21157852
ARIC	1.5 T MRI scanners (General Electric Medical Systems)	FSL FIRST Freesurfer	Total intracranial volume was measured from T1 weighted spin echo sagittal images, each set consisting of 32 contiguous 5 mm thick interleaved sections with no interslice gap, a field of view of 24 cm, and a matrix of 256 × 192, obtained with the following sequence: scan time, 2.5 minutes; echo time, 14 milliseconds; 2 repetitions; and repetition time, 500 milliseconds. A 3D volumetric spoiled gr…	NA
ASPSFam	3.0 T Tim Trio (Siemens, Erlangen)	FreeSurfer (5.1.0)	T1-MPRAGE 1x1x1mm	NA
Betula	3.0 T GE Discovery 750	FSL FIRST (4.1.9)	A GE 3T Discovery 750 scanner with a 32 channel head coil was used. A 3D FSPGR T1-weighted sequence (duration was 8:11min) without SCIC-reconstruction were run for all participants. Each volume consisted of 176 axial slices with TE=3.2 ms, TI=450ms, flip angle=12° and 256×256 acquisition matrix, which was zipped to 512x512. Resulting in a voxel size of 0.489x0.489x1 mm³.
BFS	1.5 T GE Signa Scanner	FreeSurfer (5.1.0)	Coronal gradient echo sequence with magnetization preparation with 128 coronal high-resolution T1-weighted images (TI=600 ms; TE=3.4 ms; flip angle=15°; FOV=22 cm; slice thickness=1.7 mm, matrix=256x192)	25534753; 25708817; 23218918; 23483904; 23218918; 22850735; 22760554; 21601834; 21429475
BIG	1.5 T & 3.0 T Siemens MRI scanners	FSL FIRST (4.1.7)	MRI data in BIG were acquired with either a 1.5 Tesla Siemens Sonata or Avanto scanner or a 3 Tesla Siemens Trio or TimTrio scanner (Siemens Medical Systems, Erlangen, Germany). Given that images were acquired during several smaller scale studies, the parameters used were slight variations of a standard T1-weighted three-dimensional magnetization prepared rapid gradient echo sequence (MPRAGE; 1.0…	24827550
BrainSCALE	1.5 T Philips Achieva	FreeSurfer (5.1.0)	A three-dimensional T1-weighted coronal spoiled-gradient echo scan of the whole head (256 x 256 matrix, TE = 4.6 ms, TR = 30 ms, flip angle = 30º, 160–180 contiguous slices; 1 x 1 x 1.2 mm3 voxels, field-of-view = 256 mm/70%) was acquired.	19294640
BRCDECC	1.5 T GE Signa HDx	FreeSurfer (5.1.0)	Images were acquired using a 1.5T GE Signa HDx system ((General Electric, Milwaukee, WI, USA. Using a custom-written pulse sequence, Magnetisation-Prepared Rapid Gradient Echo (MP-RAGE) T1-weighted scans were acquired at 1.5T (General Electric, WI, USA), with the parameters: TE = 3.8 ms, TR = 8.59 ms, flip angle = 8°, field of view = 24 × 24 cm, slice thickness = 1.2 mm, number of slices = 180 an…	21157852
CHS	1.5 T MRI	FreeSurfer (5.3.0)	MRI scanning was completed at each of the four sites using 1.5 Tesla scanners. The scanning protocol included a 3-D volumetric T1 weighted Spoiled Gradient Recall (SPGR) sequence covering the whole brain (TE/TR = 5/25, flip angle = 40°, NEX = 1, slice thickness = 1.5 mm/0 mm interslice gap), with an in-plane acquisition matrix of 256 × 256 × 124 image elements, 250 × 250 mm field of view and an i…	21943959; 7847205; 8303738
EDIS-SIMES & EDIS-SCES	3.0 T Siemens Magnetom Trio Tim scanner	FreeSurfer (5.1.0)	Brain tissue segmentation was quantified by Proton density T1-weighted imaging (1.0x1.0x1.0 mm3 voxels, TR = 7.2ms, TE = 3.3ms, matrix = 256×256×180 mm3), T2-weighted (1.0x1.0x1.5 mm3 voxels, TR = 3000ms, TE = 10.1ms, matrix = 256x247 mm3) and Fluid Attenuated Inversion Recovery (FLAIR) images (1.0x1.0x3.0 mm3; TR = 9.3ms, TE = 140ms, matrix = 256x192 mm3) at the Erasmus University Medical Center…	25451722; 24481144
EPIGEN	3.0 T Philips Achieva	FreeSurfer (4.5.0)	UK: 3T GE Excite HDx scanner. All data were acquired using a body coil for transmission, and 8-channel phased array coil for reception. whole-brain T1-weighted IR-prepared FSPGR scan with parameters: TR=8 ms, TE=3 ms, TI=450 ms, NEX=1; flip angle =20°; matrix 256×256, FOV=18×24 cm, thickness=1.1mm, voxel resolution of 0.9375×0.9375×1.1 mm3 . Ireland: 1.5T GE Signa scanner. A 3-D SPGR sequence was…
ERF	1.5 T MRI unit (GE Healthcare, Milwaukee, USA, software version 11×)	FreeSurfer (5.1.0)	Structural imaging is performed with T1-weighted (T1w), proton density-weighted (PDw) and fluid-attenuated inversion recovery (FLAIR) sequences. The combination of different MR contrasts provided by these sequences can be used for automated brain tissue and white matter lesion segmentation. For this purpose, the T1w scan is acquired in 3D at high in-plane resolution and with thin slices (voxel si…	26650042
FHS-1 FHS-2	1.5T Siemens Magnetom 1 or 1.5T Siemens Magnetom	FreeSurfer (5.3.0) In-house - measurement of caudate and putamen	MRI were performed on a 1T or 1.5T Siemens magnetom. We used a 3-dimensional T1-weighted MP-RAGE sequences with voxel resolution=1.3 x 0.98 x 1.5, matrix=192 x 256, TR=1900, TI=1100, flip angle=9. 1.5T images were used for FreeSurfer processing from n=1035 FHS Offspring participants. 1.0T and 1.5T images were used for in-house processing of caudate and putamen with software developed by the IDeA …	15653178; 15653178; 11832223
GeneSTAR	3.0 T Philips Achieva 3.2.1	MIPAV (NIH, U-Penn)	Sagittal T1 weighted: TR (repetition time) 550 ms, TE (time to echo) 10 ms, 5 mm contiguous images, FOV (field of view) 230 mm, 256 X 256 matrix; Axial T1-weighted MPRAGE:TR TE, TI (inversion time), 1mm contiguous, FOV 240, matrix 256x256x160;Axial turbo spin echo proton density weighted: TR, TE, 3mm contiguous, FOV 240 mm; Axial turbo spin echo T2-weighted: TR 4880 ms, TE 75 ms, 3 mm contiguous,…	25659858; 17604116
GIG	3.0 T Siemens Magnetom TIM Trio	FSL FIRST (4.1.9)	T1-weighted 3D MP-RAGE sequence (TR/TE/TI/FA=2250 ms/3.26 ms/900 ms/9°; matrix=256x256; duration: 8 min 26 sec). Each volume consisted of 192 sagittal slices with isotropic voxels of 1.0x1.0x1.0 mm3.
GSP	3.0 T Tim Trio scanners at 2 sites	FreeSurfer (4.5.0)	high-resolution multi-echo T1- weighted magnetization-prepared gradient-echo image (multi-echo MP-RAGE) using the following parameters: TR = 2200 ms, TI = 1100 ms,TE = 1.54ms for image 1 to 7. 1ms for image 4, FA = 7°,1.2x1.2x1.2 mm, and FOV = 230.	26175908
HUBIN	1.5 T General Electronics Signa	FreeSurfer (3.0.2)	T1-weighted images, using a three-dimensional spoiled gradient recalled (SPGR) pulse sequence, were acquired with the following parameters; 1.5 mm coronal slices, no gap, 35° flip angle, repetition time (TR) = 24 ms, echo time (TE) = 6.0 ms, number of excitations (NEX) = 2, field of view (FOV) = 24 cm, acquisition matrix = 256 × 192. T2-weighted images were acquired with the following parameters;…
HUNT	1.5 T General Electric Signa	FreeSurfer (5.3.0)	The examinations were conducted by eight MRI technologists following a standardized written and illustrated procedure. All volunteers underwent the same scan protocol. The MRI protocol included a sagittal T1 weighted IR-FSPGR volume, the Alzheimer’s disease Neuroimaging Initiate (ADNI) volume: Matrix size: 192x192 NSA: 1, TR: 10.2 ms, TE: 4.1 ms, Flip-angle: 10°, Slice thickness 1,2 mm, Gap: 0 mm…	26950220
IMAGEN	3.0 T Philips Medical Systems Achieva, 3.0 T Brucker, 3.0 T Siemens TrioTim, 3.0 T Siemens Verio, 3.0 T Brucker/GE Medical Systems Signa Excite, 3.0 T GE Medical Systems Signa HDx	FSL FIRST (4.1.5)	Magnetic resonance imaging data were acquired at 8 European centers, using a standardised 3 Tesla, T1-weighted gradient echo protocol (voxel size=1.1 mm isotropic) based on that from the ADNI initiative (http://adni.loni.usc.edu/methods/documents/mri-protocols/)
IMpACT	1.5 T MRI scanner Avanto Siemens, Munich, Germany	FSL FIRST (5.0.4)	All scans covered the entire brain and had a voxel size of 1×1×1 mm3, TR 2730 ms, TI=1000 ms, TE 2.95 ms, 176 sagittal slices, field of view 256 mm. The automatic segmentation of subcortical brain structures was based on Bayesian statistical models of shape and appearance for 17 subcortical structures from 317 manually labeled T1-weighted MR images.	24345721
LBC1936	1.5 T GE Signa Horizon HDx clinical scanner	Freesurfer (4.3.0)	3D IR-Prep T1-weighted whole brain FSPGR volumes were acquired in the coronal plane using a GE Signa Horizon HDxt 1.5 T clinical MRI scanner with manufacturer supplied eight-channel phased-array head coil; FOV = 256 x 256 mm, matrix = 192 x 192, 160 x 1.3 mm thick slices, 1 x 1 x 1.3 mm voxels, TR = 10 ms, TE = 4 ms and TI = 500 ms.	22111801
LIBD	1.5 T GE	FreeSurfer (5.0.0)	T1-weighted spoiled gradient recalled sequence (spgr). Repetition time, 24 milliseconds; echo time, 5 milliseconds; number of excitations, 1; flip angle, 45 degrees; matrix size 256 x 256; field of view, 24 x 24 cm; 124 sagittal slices (0.94 x 0.94 x 1.5 mm).
LIFE-Adult	3.0 T MRI (Siemens Verio)	FreeSurfer (5.0.0)	3D MPRAGE sequence with GRAPPA parallel imaging technique applied on the Alzheimer’s Disease Neuroimaging Initiative (ADNI) standard protocol with the following parameters: TI 900 ms, TR 2300 ms, TE 2.98 ms, flip angle 9°, band width 240 Hz/pixel, image matrix 256×240, 176 partitions, FOV 256×240×176 mm³, sagittal orientation, voxel size 1×1×1 mm³, no interpolation.	26973099; 26197779
MCIC	1.5 T Siemens (at 2 sites), 3.0 T Siemens Trio (at 1 site) and 1.5 T GE Signa (at 1 site)	FreeSurfer (4.0.1)	T1 scans: TR = 2530 ms for 3 T, TR = 12 ms for 1.5 T; TE = 3.79 ms for 3 T, TE = 4.76 ms for 1.5 T; FA = 7 for 3 T, FA = 20 for 1.5 T; TI = 1100 for 3 T; Bandwidth = 181 for 3 T, Bandwidth = 110 for 1.5 T; 0.625×0.625 mm voxel size; slice thickness 1.5 mm; FOV 256×256×128 cm matrix; FOV = 16 cm (could be increased to 18 cm when needed for full brain coverage). T2 scans: TR = 10,000 ms for 3 T, TR…
MooDS	3.0 T Siemens Trio at 3 sites (Bonn, Berlin and Mannheim)	FreeSurfer (5.1.0)	Three 3D MPRAGE T1-weighted sequences were used (TR=1570 ms; TE=2.75 ms; NEX=1; flip angle =15 degree; matrix size=256x256; FOV=256X256 mm2; slice thickness=1 mm). This gave isotropic voxel with volume=1mm3. Three MPRAGE were acquired in identical scanner in Bonn, Berlin and Mannheim and combined to an average image using FreeSurfer.
MPIP	1.5 T GE Signa (Excite), and 1.5 T Siemens Vario at 2 sites	FSL FIRST (4.1.5)	#1: GE Signa, 1.5T T1-weighted SPGR sagittal 3D volume (TR=10.3 s; TE=3.4 ms; 124 slices, matrix size=256x256, FOV=23.0x23.0 cm2, voxel size=0.8975x0.8975x[1.2-1.4] mm3, flip angle=90°, birdcage resonator) (N=347) #2: same scanner as #1, platform update Signa Excite, sagittal T1-weighted (spin echo sequence, TR=9.7 ms, TE=2.1 ms, FOV 25.0x25.0 cm2, voxel size= 0.875x0.875x1.2 mm3, 124-132 slices,…
NCNG	1.5 T Siemens Sonata and 1.5 T Siemens Avanto at 2 sites	FreeSurfer (4.5.0)	Two 3D MP-RAGE T1-weighted sequences (duration: 8 min 46 s) were run for all participants. Each volume consisted of 128 sagittal slices (1.33x1x1 mm3), with an in-plane voxel size of 1 mm3 (TR=2730 ms; TE=3.43 ms; TI=1000 ms; flip angle=7°; and 256×256 matrix). #2: A Siemens Avanto scanner was used to acquire two 3D MP-RAGE T1-weighted sequences (TR/TE/TI/FA=2400 ms/3.61 ms/1000 ms/8°; matrix=192…
NESDA	3.0 T Phillips at 3 sites	FreeSurfer (5.1.0)	Imaging data were acquired using a Philips 3T magnetic resonance imaging system (Best, The Netherlands) located at the Leiden University Medical Center, Amsterdam Medical Center, and University Medical Center Groningen, equipped with a SENSE-8 (Leiden University Medical Center and University Medical Center Groningen) or SENSE-6 (Amsterdam Medical Center) channel head coil. For each subject, anato…
neuroIMAGE	1.5 T Siemens Sonata and 1.5 T Siemens Avanto (2 test sites)	FreeSurfer (5.3.0)	1.5T MRI scanners were employed (Siemens SONATA and Siemens AVANTO; Siemens, Erlangen, Germany), using identical head coils (8-channel Phase Array Head Coil). T1-weighted whole-brain scan (MP-RAGE, 176 slices, acquisition matrix 256x256, voxelsize:1.0x1.0x1.0mm; TE/TR=2.95/2730ms, TI=1000ms, FA=7°; GRAPPA-acceleration 2)
NTR	3.0 T Philips Intera at one site and 1.5 T Siemens Sonata at two sites and 1.5 T Philips Gyroscan at one site	FreeSurfer (5.1.0)	#1: A Philips Intera 3.0 T scanner (Philips, Medical Systems, Best) with a standard SENSE receiver head coil was used. A 3D gradient-echo T1-weighted sequence (technique: T1TFE) was run for all. 182 coronal slices (1.00x1.00x1.20 mm3), (TR=9.64 ms; TE=4.60 ms; flip angle=8°; and 256×256). #2: A Siemens Sonata 1.5 T scanner (Siemens, Erlangen, Germany) with a standard circularly polarized head coi…	20823085; 17346990
OATS	1.5 T Philips Gyroscan; 3.0 T Philips Achieva Quasar Dual; 1.5 T Siemens Magnetom Avanto; 1.5 T Siemens Sonata	FSL FIRST (4.1.5)	(1) Sequence name T1TFE. In-plane resolution 1×1 mm. 256 × 256 matrix. Slice thickness 1.5 mm without gap. Number of slices: 150. Orientation: cor TR/TE: 7.73/3.7 ms Flip angle: 8°. Scan duration: 385 sec. (2) Acquisition parameters for T1-weighted structural MRI scans were: TR = 6.39 ms, TE = 2.9 ms, flip angle = 8°, matrix size = 256x256, FOV = 256x256x190, and slice thickness = 1 mm with no ga…	19943720
PAFIP	1.5 T GE SIGNA System	FreeSurfer (5.0.0)	T1-weighted images, using a spoiled grass (SPGR) sequence, were acquired in the coronal plane with the following parameters: echo time (TE)=5 ms, repetition time (TR)=24 ms, number of excitations (NEX)=2, rotation angle=45°, field of view (FOV)=26×19.5 cm, slice thickness=1.5 mm and a matrix of 256×192.
QTIM	4.0 T Bruker Medspec at 1 site.	FSL FIRST (4.1.9)	Scans were collected on a 4 Tesla Bruker Medspec scanner (Bruker, Germany). T1-weighted structural scans were acquired with acquisition parameters: TR=1500ms, TE=3.35ms, TI=700ms, flip angle=8°, 256 or 240 (coronal or sagittal) slices, FOV=240mm, acquisition voxel size 1.1x0.9x0.9mm.
ROSMAP	1.5 T MRI unit (GE Healthcare, Milwaukee, USA, software version 11×)	FreeSurfer	3D magnetization-prepared rapid acquisition gradient echo (MPRAGE) sequence	NA
RSI	1.5 T MRI unit (GE Healthcare, Milwaukee, USA, software version 11×)	FreeSurfer (5.1.0)	Structural imaging is performed with T1-weighted (T1w), proton density-weighted (PDw) and fluid-attenuated inversion recovery (FLAIR) sequences. The combination of different MR contrasts provided by these sequences can be used for automated brain tissue and white matter lesion segmentation (see section on processing). For this purpose, the T1w scan is acquired in 3D at high in-plane resolution an…	26650042
RSII	1.5 T MRI unit (GE Healthcare, Milwaukee, USA, software version 11×)	FreeSurfer (5.1.0)	Structural imaging is performed with T1-weighted (T1w), proton density-weighted (PDw) and fluid-attenuated inversion recovery (FLAIR) sequences. The combination of different MR contrasts provided by these sequences can be used for automated brain tissue and white matter lesion segmentation (see section on processing). For this purpose, the T1w scan is acquired in 3D at high in-plane resolution an…	26650042
RSIII	1.5 T MRI unit (GE Healthcare, Milwaukee, USA, software version 11×)	FreeSurfer (5.1.0)	Structural imaging is performed with T1-weighted (T1w), proton density-weighted (PDw) and fluid-attenuated inversion recovery (FLAIR) sequences. The combination of different MR contrasts provided by these sequences can be used for automated brain tissue and white matter lesion segmentation (see section on processing). For this purpose, the T1w scan is acquired in 3D at high in-plane resolution an…	26650042
SHIP	1.5 T Siemens Avanto	FSL FIRST (4.1.9)	3D T1-weighted MRI sequence with the following parameters: MP-RAGE/ axial plane, TR=1900 ms, TE=3.4 ms and Flip angle=15° and an original resolution of 1.0 x 1.0 x 1.0mm3
SHIP-TREND	1.5 T Siemens Avanto	FSL FIRST (4.1.9)	3D T1-weighted MRI sequence with the following parameters: MP-RAGE/ axial plane, TR=1900 ms, TE=3.4 ms and Flip angle=15° and an original resolution of 1.0 x 1.0 x 1.0mm3
Sydney MAS	3.0 T Philips Achieva Quasar Dual	FSL FIRST (4.1.5)	Acquisition parameters for T1-weighted structural MRI scans were: TR = 6.39 ms, TE = 2.9 ms, flip angle = 8°, matrix size = 256x256, FOV = 256x256x190, and slice thickness = 1 mm with no gap between; yielding 1x1x1 mm3 isotropic voxels	20637138
TOP	1.5 T Siemens Magnetom Sonata	FreeSurfer (4.5.0)	Two sagittal T1-weighted magnetization prepared rapid gradient echo (MPRAGE) volumes were acquired with the Siemens tfl3d1_ns pulse sequence (TE = 3.93 ms, TR = 2730 ms, TI = 1000 ms, flip angle = 7°; FOV = 24 cm, voxel size= 1.33 x 0.94 x 1 mm3, number of partitions = 160) and subsequently averaged together, after rigid-body registration, to increase the signal to noise ratio.
UKBB	3.0 T Siemens Skyra	FSL FIRST	The T1 structural protocol was acquired at 1mm isotropic resolution using a three-dimensional MPRAGE acquisition with the following parameters: voxel size = 208 x 256 x 256, R=2, TI/TR=880/2000 ms, and superior-inferior FOV = 256mm in order to include reasonable amounts of neck/mouth. Subcortical volumes were estimated using population priors on shape and intensity variation across subjects.	27643430; 21352927; doi.org/10.1101/130385
UMCU	1.5 T Philips Intera and 1.5 T Philips Achieva, both at 1 site (University Medical Centre Utrecht, Netherlands)	FreeSurfer (5.1.0)	At both scanners a 3-dimensional (3D), T1-weighted Fast Field Echo (3D-FFE) scan of the whole head (256 × 256 matrix, echo time [TE] = 4.6 ms, repetition time [TR] = 30 ms, flip angle = 30°, 160–180 contiguous slices; 1 × 1 × 1.2 mm3 voxels, field of view [FOV] = 256 mm/70%) was acquired for the quantitative measurements.	21242319
UMCU-UCLA	3.0 T Philips Achieva	FreeSurfer (5.1.0)	T1-weighted FFE: 200 contiguous sagittal slices, TE=4.6 ms, TR=10 ms, flip angle=8˚, FOV = 240mm, 0.75 x 0.75 x 0.80 mm³ voxels

## Sheet: Supplementary Table 6
Supplementary Table 6. Genotyping and quality control for study samples
Study sample	HWE	MAF	Call Rate	Association	Imputation	Reference	Genotype Platform
3C-Dijon	1x10-6	0.01	0.95	mach2qtl (1.1.2)	minimac RELEASE STAMP 2012-11-16	ALL 1000 Genomes (phase 1 version 3; March 2012)	Illumina Human610-Quad BeadChip
ADNI	1x10-6	0.01	0.95	mach2qtl (1.1.2)	minimac (release 2012-05-29)	EUR 1000 Genomes (phase 1 version 3; March 2012)	Illumina Human610-Quad BeadChip
ADNI2GO	1x10-6	0.01	0.95	mach2qtl (1.1.2)	minimac (release 2012-05-29)	EUR 1000 Genomes (phase 1 version 3; March 2012)	Illumina Human Omni Express
AGES-Reykjavik	1x10-6	0.01	0.97	probABEL	minimac (release 2012-11-16)	ALL 1000 Genomes (phase 1 version 3; March 2012)	Illumina Hu370CNV
ALSPAC	5x10-7	0.01	0.95	plink v1.90	Impute2 v2.2.2	ALL 1000 Genomes (phase 1 version 3; March 2012)	Illumina Human Hap 550-quad
ANM	1x10-6	0.01	0.95	mach2qtl (1.1.2)	minimac (release 2012-05-29)	EUR 1000 Genomes (phase 1 version 3; March 2012)	Illumina Human610-Quad BeadChip v1
ARIC	1x10-6	0.01	0.95	probABEL	IMPUTE2 2.2.2	ALL 1000 Genomes (phase 1 version 3; March 2012)	Affymetrix 6.0
ASPSFam	1x10-6	0.05	0.98	GWAF 2.0	IMPUTE2 2.2.2	1000G ALL phase1 integrated variant set release v3 (March 2012)	Affymetrix Genome-Wide Human SNP Array 6.0
Betula	1x10-3	0.01	0.95	mach2qtl (1.1.2)	minimac (release 2012-05-29)	EUR 1000 Genomes (phase 1 version 3; March 2012)	Illumina Human Omni Express + Human Omni 1S-8 BeadChip kits
BFS	1x10-6	0.01	0.95	mach2qtl (1.1.2)	minimac (release 2012-05-29)	EUR 1000 Genomes (phase 1 version 3; March 2012)	Illumina OmniExpress
BIG	1x10-6	0.01	0.95	mach2qtl (1.1.2)	minimac (release 2012-05-29)	EUR 1000 Genomes (phase 1 version 3; March 2012)	Affymetrix 6.0
BrainSCALE	1x10-5	0.01	0.9	merlin-offline (1.1.2)	minimac (release 2012-05-29)	EUR 1000 Genomes (phase 1 version 3; March 2012)	Affymetrix 6.0
BRCDECC	1x10-6	0.01	0.95	mach2qtl (1.1.2)	minimac (release 2012-05-29)	EUR 1000 Genomes (phase 1 version 3; March 2012)	Illumina HumanHap610-Quad BeadChip v1
CHS	1x10-5	-	0.97	R	minimac (release 2012-11-16)	ALL 1000 Genomes (phase 1 version 3; March 2012)	Illumina Human370CNV BeadChip + IBC (EU), Illumina Human Omni1M BeadChip (AA)
EDIS-SCES	1x10-6	0.01	0.95	SNPtest	minimac	All 1000 Genomes (phase 1, version 3)	Illumina Human 610 Quad BeadChips and Illumina Human OmniExpress BeadChips
EDIS-SIMES	1x10-6	0.01	0.95	SNPtest	minimac	All 1000 Genomes (phase 1, version 3)	Illumina Human 610 Quad BeadChips
EPIGEN	1x10-6	0.01	0.95	mach2qtl (1.1.2)	minimac (release 2012-05-29)	EUR 1000 Genomes (phase 1 version 3; March 2012)	Dublin samples: Illumina Human610-Quad BeadChip v1
ERF	1x10-6	0.01	0.98	probABEL	MaCH (Mach 1.0.18.c) and minimac (2012.8.15)	ALL 1000 Genomes (phase 1 version 3; March 2012)	Illumina Human610- Quad BeadChip and/or 370k illumina BeadChip
FHS	1x10-6	< 0.01	< 97%	Perl and R	MACH	ALL 1000 Genomes (phase 1 version 3; March 2012)	Affymetrix 500K (250K Nsp & 250K Sty), MIPS 50K
GeneSTAR	1x10-6	-	0.9	R coxme/lmekin	IMPUTE2 2.2.2	ALL 1000 Genomes (phase 1 version 3; March 2012)	Illumina 1M_v1c Human chip
GIG	1x10-6	0.01	0.95	mach2qtl (1.1.2)	minimac (release 2012-05-29)	EUR 1000 Genomes (phase 1 version 3; March 2012)	Illumina Omni Express - 12 v 1.0 - DNA Analysis Bead Chip Kit
GSP	1x10-6	0.01	0.95	mach2qtl (1.1.2)	minimac (release 2012-05-29)	EUR 1000 Genomes (phase 1 version 3; March 2012)	Illumina HumanOmniExpress BeadChip
HUBIN	1x10-6	0.01	0.95	mach2qtl (1.1.2)	minimac (release 2012-05-29)	EUR 1000 Genomes (phase 1 version 3; March 2012)	Illumina Human OmniExpressExome-8v1
HUNT	1x10-6	0.01	0.95	mach2qtl (1.1.2)	minimac (release 2012-05-29)	EUR 1000 Genomes (phase 1 version 3; March 2012)	Omni2.5-8 Scanner HiScan Protocol used at the core infinium_lcg_assay_manual_euc_15023140_reva infinium_lcg_assay_auto_euc_15023141_reva
IMAGEN	1x10-6	0.01	0.95	mach2qtl (1.1.2)	minimac (release 2012-05-29)	EUR 1000 Genomes (phase 1 version 3; March 2012)	Illumina 610-Quad and Illumina 660W-Quad
IMpACT	1x10-6	0.01	0.95	SNPTEST v2.4.1	IMPUTE v2.2.2	ALL 1000 Genomes (phase 1 version 3; March 2012)	Illumina Human CytoSNP-12 v2.1
LBC1936	1x10-3	0.01	0.98	mach2qtl (1.1.2)	minimac (release 2012-05-29)	EUR 1000 Genomes (phase 1 version 3; March 2012)	Illumina Human 610_Quadv1
LIBD	1x10-6	0.01	0.95	mach2qtl (1.1.2)	minimac (release 2012-05-29)	EUR 1000 Genomes (phase 1 version 3; March 2012)	Illumina Human550K BeadChip, Illumina Human610K BeadChip, Illumina Human660K BeadChip, Illumina Human2.5-Quad BeadChip, Illumina Human2.5-8 BeadChip
LIFE-Adult	1x10-6	>0	0.97	SNPTEST (v2.5.2)	SHAPEIT (v2.r790) + IMPUTE2 (v2.3.2)	1000 Genomes (phase 1, version 3; 2012)	Affymetrix Axiom CEU1
MCIC	1x10-6	0.01	0.95	mach2qtl (1.1.2)	minimac (release 2012-05-29)	EUR 1000 Genomes (phase 1 version 3; March 2012)	Illumina HumanOmni-Quad BeadChip
MooDS	1x10-4	0.01	0.98	mach2qtl (1.1.2)	minimac (release 2012-09-19)	EUR 1000 Genomes (phase 1 version 3; March 2012)	Illumina Human660W-Quad v1_A; Illumina Human610-Quad v1
MPIP	1x10-6	0.01	0.95	mach2qtl (1.1.2)	minimac (release 2012-05-29)	EUR 1000 Genomes (phase 1 version 3; March 2012)	Illumina 100K, Illumina 300K, Illumina 550K, Illumina 610K, Illumina 660K
NCNG	1x10-6	0.01	0.95	mach2qtl (1.1.2)	minimac (release 2012-05-29)	EUR 1000 Genomes (phase 1 version 3; March 2012)	Illumina 610K
NESDA	1x10-5	0.01	0.9	mach2qtl (1.1.2)	minimac (release 2012-05-29)	EUR 1000 Genomes (phase 1 version 3; March 2012).	Perlegen-Affymetrix 5.0/ Affymetrix Human SNP Array 6.0 907K
neuroIMAGE	1x10-6	0.01	0.95	mach2qtl (1.1.2)	minimac (release 2012-05-29)	EUR 1000 Genomes (phase 1 version 3; March 2012)	Perlegen Sciences 600K
NTR	1x10-5	0.01	0.9	merlin-offline (1.1.2)	minimac (release 2012-05-29)	EUR 1000 Genomes (phase 1 version 3; March 2012).	Perlegen-Affymetrix 5.0, Illumina 660K, Illumina 370K, Affymetrix 6.0 907K, Illumina Omni 1M
OATS	1x10-6	0.01	0.95	mach2qtl (1.1.2)	minimac (release 2012-05-29)	EUR 1000 Genomes (phase 1 version 3; March 2012)	Illumina HumanOmniExpress-12v1_A
PAFIP	1x10-6	0.01	0.95	mach2qtl (1.1.2)	minimac (release 2012-05-29)	EUR 1000 Genomes (phase 1 version 3; March 2012)	Affymetrix 6.0
QTIM	1x10-6	0.01	0.95	merlin-offline (1.1.2)	minimac (release 2012-05-29)	EUR 1000 Genomes (phase 1 version 3; March 2012)	Illumina Human610-Quad BeadChip
ROSMAP	1x10-6	0.01	0.95	plink v1.07	Beagle (3.3.2)	1000 Genomes Project Consortium interim phase I haplotypes, 2010–2011 data freeze	Illumina OmniExpress
RSI	1x10-6	0.01	0.98	probABEL	MaCH (Mach 1.0.18.c) and minimac (2012.8.15)	ALL 1000 Genomes (phase 1 version 3; March 2012)	Illumina Human 550 (+duo) and 610-Quad BeadChip
RSII	1x10-6	0.01	0.98	probABEL	MaCH (Mach 1.0.18.c) and minimac (2012.8.15)	ALL 1000 Genomes (phase 1 version 3; March 2012)	Illumina Human 550 duo
RSIII	1x10-6	0.01	0.98	probABEL	MaCH (Mach 1.0.18.c) and minimac (2012.8.15)	ALL 1000 Genomes (phase 1 version 3; March 2012)	Illumina Human610-Quad BeadChip
SHIP	1x10-4	>0	0.8 (per SNP)	QUICKTEST v0.95	IMPUTE v2.2.2	ALL 1000 Genomes (phase 1 version 3; March 2012)	Affymetrix 6.0
SHIP-TREND	1x10-4	>0	0.9 (per SNP)	QUICKTEST v0.95	IMPUTE v2.2.2	ALL 1000 Genomes (phase 1 version 3; March 2012)	Illumina Omni 2.5
Sydney MAS	1x10-6	0.01	0.95	mach2qtl (1.1.2)	minimac (release 2012-05-29)	EUR 1000 Genomes (phase 1 version 3; March 2012)	Affymetrix 6.0
TOP	1x10-6	0.01	0.95	mach2qtl (1.1.2)	minimac (release 2012-05-29)	EUR 1000 Genomes (phase 1 version 3; March 2012)	Illumina HumanHap550 BeadChip
UKBB	1x10-6	0.01	0.9	RareMetalWorker	IMPUTE4	Haplotype Reference Consortium (HRC, version 1.1)	Applied Biosystems™ UK BiLEVE Axiom™ Array by Affymetrix and Applied Biosystems™ UK Biobank Axiom™ Array
UMCU	1x10-6	0.01	0.95	mach2qtl (1.1.2)	minimac (release 2013-07-17)	EUR 1000 Genomes	Illumina OmniExpress
UMCU-UCLA	1x10-6	0.01	0.95	mach2qtl (1.1.2)	minimac (release 2013-07-17)	EUR 1000 Genomes	Illumina OmniExpress

## Sheet: TableS1
Table S1. Association between SNPs of interest with other subcortical structures
SNP found in	Look-up in	SNP	Chromosome	Position	Gene annotation	Coded / non-coded allele	Frequency of the coded allele	Weight	Z-score	P-value
Nucleus accumbens	Amygdala	rs11747514	5	65839259	MAST4	t/g	0.2231	25552	-3.784	0.00015
	Amygdala	rs145293717	3	190642692	SNAR-I	t/g	0.0867	25192	-2.741	0.00612
	Globus pallidus	rs11747514	5	65839259	MAST4	t/g	0.2231	25534	-3.31	0.00093
	Putamen	rs11747514	5	65839259	MAST4	t/g	0.2232	25393	-3.501	0.00046
	Putamen	rs145293717	3	190642692	SNAR-I	t/g	0.0868	25194	-2.375	0.01757
	Thalamus	rs145293717	3	190642692	SNAR-I	t/g	0.0867	25225	-2.737	0.00621
	Thalamus	rs11747514	5	65839259	MAST4	t/g	0.2231	25585	-2.289	0.02208
Amygdala	Nucleus accumbens	rs429358	19	45411941	APOE	t/c	0.8439	22680	4.581	4.6e-06
	Nucleus accumbens	rs11111293	12	102921296	IGF1	t/c	0.7794	23565	4.063	4.8e-05
	Brainstem	rs11111293	12	102921296	IGF1	t/c	0.7782	19812	-4.807	1.5e-06
	Caudate	rs11111293	12	102921296	IGF1	t/c	0.7805	25445	2.209	0.0272
	Putamen	rs11111293	12	102921296	IGF1	t/c	0.7805	25275	2.62	0.00878
	Putamen	rs429358	19	45411941	APOE	t/c	0.8465	24391	2.579	0.00992
	Thalamus	rs429358	19	45411941	APOE	t/c	0.8467	24582	3.456	0.00055
Brainstem	Nucleus accumbens	rs9398173	6	109000316	FOXO3	t/c	0.3488	23683	-2.62	0.0088
	Globus pallidus	rs9398173	6	109000316	FOXO3	t/c	0.3495	25534	-3.307	0.00094
	Putamen	rs112994922	6	149919887	KATNA1	d/i	0.3193	23916	2.425	0.01532
	Putamen	rs9398173	6	109000316	FOXO3	t/c	0.3499	25393	-2.221	0.02638
	Thalamus	rs1549192	5	64965900	SGTB	t/c	0.7388	25585	-3.381	0.00072
	Thalamus	rs112994922	6	149919887	KATNA1	d/i	0.3194	23947	2.737	0.0062
	Thalamus	rs1349470	20	61145196	C20orf166-AS1	a/g	0.3316	23129	-2.578	0.00995
	Thalamus	rs9398173	6	109000316	FOXO3	t/c	0.3496	25585	-2.416	0.01567
Caudate nucleus	Putamen	rs2845878	11	92019253	FAT3	c/g	0.3338	25393	4.12	3.8e-05
	Putamen	rs76099988	9	98329371	PTCH1	a/t	0.0851	25275	2.118	0.03417
	Putamen	rs7584428	2	45128493	SIX3	a/g	0.3984	25393	-2.018	0.04364
Globus pallidus	Nucleus accumbens	rs148470213	14	56193700	KTN1	t/c	0.5428	23683	4.934	8.1e-07
	Nucleus accumbens	rs12128419	1	21864879	ALPL	t/c	0.6729	23521	-2.916	0.00355
	Brainstem	rs1349470	8	42430502	SMIM19	a/g	0.581	19930	3.456	0.00055
	Caudate	rs148470213	14	56193700	KTN1	t/c	0.5436	25563	4.894	9.9e-07
	Putamen	rs148470213	14	56193700	KTN1	t/c	0.5436	25393	11.753	6.8e-32
	Thalamus	rs1349470	8	42430502	SMIM19	a/g	0.5832	25585	2.396	0.01658
Putamen	Nucleus accumbens	rs8017172	14	56199048	KTN1	a/g	0.4198	23683	-4.861	1.2e-06
	Nucleus accumbens	rs1484994	20	30305975	BCL2L1	a/g	0.7089	22403	3.369	0.00075
	Brainstem	rs597583	11	117421799	DSCAML1	c/g	0.7958	19930	-2.134	0.03283
	Caudate	rs1484994	20	30305975	BCL2L1	a/g	0.708	24283	4.892	1e-06
	Caudate	rs8017172	14	56199048	KTN1	a/g	0.4193	25563	-4.413	1e-05
	Caudate	rs597583	11	117421799	DSCAML1	c/g	0.7961	25563	2.785	0.00535
	Caudate	rs512556	11	83288085	DLG2	a/c	0.6373	25563	2.756	0.00584
	Caudate	rs62097986	18	50818827	DCC	a/c	0.4366	25563	-2.509	0.01212
	Caudate	rs115345435	3	76213505	ZNF717	t/c	0.013	424	1.973	0.0485
	Globus pallidus	rs8017172	14	56199048	KTN1	a/g	0.4194	25534	-6.829	8.5e-12
	Globus pallidus	rs1484994	20	30305975	BCL2L1	a/g	0.708	24254	4.848	1.2e-06
	Globus pallidus	rs512556	11	83288085	DLG2	a/c	0.6373	25534	-3.179	0.00148
	Globus pallidus	rs597583	11	117421799	DSCAML1	c/g	0.7961	25534	2.029	0.04242
Thalamus	Nucleus accumbens	rs66562752	21	22530867	NCAM2	a/c	0.5672	23683	3.23	0.00124
	Brainstem	rs66562752	21	22530867	NCAM2	a/c	0.5654	19930	4.251	2.1e-05
	Brainstem	rs143943992	14	66534309	FUT8	a/g	0.0131	1058	2.696	0.00702
	Caudate	rs66562752	21	22530867	NCAM2	a/c	0.566	25563	2.167	0.0302
	Globus pallidus	rs144443274	17	78449948	NPTX1	t/c	0.1807	22813	-4.129	3.6e-05
	Globus pallidus	rs66562752	21	22530867	NCAM2	a/c	0.566	25534	3.494	0.00048
	Globus pallidus	rs143943992	14	66534309	FUT8	a/g	0.0131	1058	2.167	0.03026
	Putamen	rs144443274	17	78449948	NPTX1	t/c	0.1807	22834	-3.163	0.00156
	Putamen	rs143943992	14	66534309	FUT8	a/g	0.0131	1058	2.536	0.01121
	Putamen	rs66562752	21	22530867	NCAM2	a/c	0.566	25393	2.191	0.02845
Bonferroni	0.000200803

## Sheet: Supplementary Table 7
Supplementary Table 7. Associationa of index SNPs with the volumes of all subcortical brain structures in the discovery and generalization samples and combined meta-analysis
							Discovery meta-analysis (European)b						Generalization 1 (African-American)c				Generalization 2 (Asian)d				Combined meta-analysise
SNP found in	Look-up in	SNP	Chromosome	Position	Coded allele	Non-coded allele	Freq coded allele	Weight	Z-score	P-value	Directionf	I²	Freq coded allele	Weight	Z-score	P-value	Freq coded allele	Weight	Z-score	P-value	Freq coded allele	Weight	Z-score	P-value	Directiong	I²
accumbens	accumbens	rs9818981	3	190602087	a	g	0.0895	32282	-6.22872	4.7e-10	---	63.2	0.3647	85	1.12793	0.2596	NA	NA	NA	NA	0.0902	32367	-6.163	7.15e-10	-+?	52.1
accumbens	amygdala	rs9818981	3	190602087	a	g	0.0889	34114	-3.91073	9.2e-05	---	0	0.3742	498	0.485	0.6273	NA	NA	NA	NA	0.093	34612	-3.824	0.0001312	-+?	0
accumbens	brainstem	rs9818981	3	190602087	a	g	0.0891	27816	-1.89459	0.0581474	---	16.7	0.3647	85	0.849	0.3958	NA	NA	NA	NA	0.0899	27901	-1.845	0.06506	-+?	0
accumbens	caudate	rs9818981	3	190602087	a	g	0.089	34125	-2.08884	0.0367225	---	17.6	0.3742	498	0.803	0.4218	NA	NA	NA	NA	0.0931	34623	-1.977	0.04799	-+?	9
accumbens	pallidum	rs9818981	3	190602087	a	g	0.0889	34096	-1.63442	0.102171	+--	44.1	0.3742	498	1.038	0.299	NA	NA	NA	NA	0.093	34594	-1.498	0.1341	-+?	33.6
accumbens	putamen	rs9818981	3	190602087	a	g	0.089	33955	-2.11036	0.034827	---	14.3	0.3742	498	1.448	0.1476	NA	NA	NA	NA	0.0931	34453	-1.921	0.05474	-+?	65
accumbens	thalamus	rs9818981	3	190602087	a	g	0.0889	34147	-3.36403	0.000768135	---	0	0.3742	498	1.167	0.2434	NA	NA	NA	NA	0.093	34645	-3.2	0.001375	-+?	59
accumbens	accumbens	rs13107325	4	103188709	t	c	0.0638	32283	6.15024	7.74e-10	+++	76.2	NA	NA	NA	NA	NA	NA	NA	NA	0.0638	32283	6.15	7.74e-10	+??	0
accumbens	amygdala	rs13107325	4	103188709	t	c	0.0645	34152	3.57088	0.000355784	+-+	85.2	NA	NA	NA	NA	NA	NA	NA	NA	0.0645	34152	3.571	0.0003558	+??	0
accumbens	brainstem	rs13107325	4	103188709	t	c	0.0632	28530	-1.96585	0.0493154	---	0	NA	NA	NA	NA	NA	NA	NA	NA	0.0632	28530	-1.966	0.04932	-??	0
accumbens	caudate	rs13107325	4	103188709	t	c	0.0658	37462	4.25988	2.05e-05	+++	0	NA	NA	NA	NA	NA	NA	NA	NA	0.0658	37462	4.26	2.05e-05	+??	0
accumbens	pallidum	rs13107325	4	103188709	t	c	0.0646	34134	-0.589266	0.555683	++-	93.1	NA	NA	NA	NA	NA	NA	NA	NA	0.0646	34134	-0.589	0.5557	-??	0
accumbens	putamen	rs13107325	4	103188709	t	c	0.0658	37453	3.14108	0.00168328	+++	32.7	NA	NA	NA	NA	NA	NA	NA	NA	0.0658	37453	3.141	0.001683	+??	0
accumbens	thalamus	rs13107325	4	103188709	t	c	0.0646	34185	0.920891	0.357108	--+	85.7	NA	NA	NA	NA	NA	NA	NA	NA	0.0646	34185	0.921	0.3571	+??	0
accumbens	accumbens	rs11747514	5	65839259	t	g	0.2247	32562	-5.9893	2.11e-09	---	0	NA	NA	NA	NA	0.0808	341	-1.202	0.2293	0.2232	32903	-6.081	1.2e-09	-?-	0
accumbens	amygdala	rs11747514	5	65839259	t	g	0.2247	34431	-3.60775	0.000308859	---	46.4	0.0449	684	0.564	0.5728	0.0808	341	-1.634	0.1022	0.2198	35456	-3.637	0.0002757	-+-	27.9
accumbens	brainstem	rs11747514	5	65839259	t	g	0.2263	28809	0.150458	0.880403	--+	51.2	NA	NA	NA	NA	0.0808	341	-0.113	0.9097	0.2246	29150	0.137	0.8908	+?-	0
accumbens	caudate	rs11747514	5	65839259	t	g	0.2246	37741	-0.536818	0.591393	+-+	54.8	0.0449	684	0.223	0.8234	0.0808	341	0.014	0.9885	0.2202	38766	-0.499	0.618	-++	0
accumbens	pallidum	rs11747514	5	65839259	t	g	0.2247	34413	-1.92507	0.0542207	--+	86	0.0449	684	-2.056	0.0398	0.0808	341	-0.087	0.9307	0.2198	35438	-2.191	0.02844	---	36.3
accumbens	putamen	rs11747514	5	65839259	t	g	0.2246	37571	-2.08639	0.036943	--+	84.2	0.0449	684	-0.978	0.3279	0.0808	341	0.199	0.842	0.2201	38596	-2.17	0.03001	--+	0
accumbens	thalamus	rs11747514	5	65839259	t	g	0.2247	34464	-2.14444	0.0319973	---	40.6	0.0449	684	-0.27	0.7873	0.0808	341	0.705	0.4806	0.2199	35489	-2.082	0.03738	--+	0
accumbens	accumbens	rs868202	14	56195762	t	c	0.5569	32562	5.90387	3.55e-09	+++	0	0.185	85	0.563303	0.5731	0.2624	341	-0.93	0.3525	0.5529	32988	5.8	6.64e-09	++-	16.7
accumbens	amygdala	rs868202	14	56195762	t	c	0.5573	34431	2.42776	0.0151924	+++	0	0.1867	769	0.197	0.8442	0.2624	341	0.515	0.6062	0.5465	35541	2.469	0.01355	+++	0
accumbens	brainstem	rs868202	14	56195762	t	c	0.5593	28809	-0.75724	0.448906	+--	27	0.185	85	-1.061	0.2886	0.2624	341	1.088	0.2765	0.5547	29235	-0.691	0.4893	--+	16.9
accumbens	caudate	rs868202	14	56195762	t	c	0.5569	37741	5.9773	2.27e-09	+++	27.4	0.1867	769	1.28	0.2007	0.2624	341	0.384	0.701	0.547	38851	6.107	1.01e-09	+++	0
accumbens	pallidum	rs868202	14	56195762	t	c	0.5573	34413	7.52907	5.11e-14	+++	0	0.1867	769	-0.263	0.7924	0.2624	341	1.079	0.2804	0.5464	35523	7.478	7.57e-14	+-+	0.4
accumbens	putamen	rs868202	14	56195762	t	c	0.5569	37571	14.7256	4.42e-49	+++	19.6	0.1867	769	1.206	0.2278	0.2624	341	1.326	0.185	0.5469	38681	14.807	1.31e-49	+++	0
accumbens	thalamus	rs868202	14	56195762	t	c	0.5573	34464	0.133966	0.89343	+--	11.9	0.1867	769	0.83	0.4066	0.2624	341	0.136	0.8917	0.5465	35574	0.267	0.7893	+++	0
amygdala	accumbens	rs11111293	12	102921296	t	c	0.7798	32444	5.16874	2.36e-07	+++	63.8	NA	NA	NA	NA	0.8886	211	-0.475	0.6347	0.7805	32655	5.114	3.16e-07	+?-	0
amygdala	amygdala	rs11111293	12	102921296	t	c	0.7805	34313	6.24779	4.16e-10	+++	0	0.9615	413	1.427	0.1535	0.8886	211	-0.305	0.7602	0.7833	34937	6.323	2.56e-10	++-	0
amygdala	brainstem	rs11111293	12	102921296	t	c	0.779	28691	-4.68994	2.73e-06	---	12.7	NA	NA	NA	NA	0.8886	211	0.258	0.7965	0.7798	28902	-4.651	3.31e-06	-?+	0
amygdala	caudate	rs11111293	12	102921296	t	c	0.7803	37623	2.56524	0.0103105	+++	0	0.9615	413	-0.327	0.7439	0.8886	211	1.019	0.3081	0.7829	38247	2.586	0.00971	+-+	0
amygdala	pallidum	rs11111293	12	102921296	t	c	0.7805	34295	1.58166	0.113727	+-+	61.1	0.9615	413	1.546	0.1221	0.8886	211	0.616	0.5382	0.7833	34919	1.783	0.07451	+++	4.3
amygdala	putamen	rs11111293	12	102921296	t	c	0.7804	37453	3.98302	6.8e-05	+++	13.7	0.9615	413	0.354	0.7233	0.8886	211	-0.302	0.7626	0.783	38077	3.965	7.35e-05	++-	0
amygdala	thalamus	rs11111293	12	102921296	t	c	0.7805	34346	0.403882	0.6863	+-+	23.6	0.9615	413	1.52	0.1284	0.8886	211	-0.433	0.6649	0.7833	34970	0.532	0.5948	++-	16
brainstem	accumbens	rs11111090	12	102326461	a	c	0.519	32562	0.40432	0.685977	+-+	0	0.8388	85	0.593023	0.5532	0.846	341	0.283	0.777	0.5232	32988	0.461	0.6451	+++	0
brainstem	amygdala	rs11111090	12	102326461	a	c	0.5194	34431	-0.654778	0.512611	+--	0	0.8667	769	-0.928	0.3534	0.846	341	0.552	0.5809	0.53	35541	-0.727	0.4673	--+	0
brainstem	brainstem	rs11111090	12	102326461	a	c	0.517	28809	10.7934	3.7e-27	+++	0	0.8388	85	0.48	0.6314	0.846	341	-0.023	0.9814	0.5218	29235	10.738	6.76e-27	++-	0
brainstem	caudate	rs11111090	12	102326461	a	c	0.5187	37741	-1.76199	0.0780709	---	0	0.8667	769	-0.599	0.5492	0.846	341	-0.849	0.3961	0.5285	38851	-1.9	0.05738	---	0
brainstem	pallidum	rs11111090	12	102326461	a	c	0.5194	34413	-0.732601	0.463802	-++	83.2	0.8667	769	-1.136	0.2558	0.846	341	0.716	0.4743	0.5301	35523	-0.818	0.4133	--+	0
brainstem	putamen	rs11111090	12	102326461	a	c	0.5186	37571	-1.94157	0.0521886	---	0	0.8667	769	-0.177	0.8597	0.846	341	-1.634	0.1023	0.5284	38681	-2.092	0.03645	---	4.5
brainstem	thalamus	rs11111090	12	102326461	a	c	0.5194	34464	1.31088	0.189898	-++	0	0.8667	769	-1.004	0.3151	0.846	341	-1.034	0.3009	0.53	35574	1.041	0.2977	+--	26.3
brainstem	accumbens	rs10217651	9	118923652	a	g	0.3842	32461	-1.26263	0.206722	-+-	77.2	0.754	85	-0.0297086	0.9763	0.7083	341	-1.243	0.2138	0.3885	32887	-1.383	0.1668	---	0
brainstem	amygdala	rs10217651	9	118923652	a	g	0.3856	34317	-0.472397	0.636644	-+-	66.8	0.8116	769	-0.464	0.6424	0.7083	341	-0.431	0.6662	0.398	35427	-0.576	0.5648	---	0
brainstem	brainstem	rs10217651	9	118923652	a	g	0.3858	28809	9.7778	1.4e-22	+++	0	0.754	85	-0.828	0.4076	0.7083	341	0.678	0.498	0.3906	29235	9.735	2.14e-22	+-+	0
brainstem	caudate	rs10217651	9	118923652	a	g	0.3877	37627	2.60882	0.00908561	+++	56.6	0.8116	769	0.052	0.9586	0.7083	341	0.961	0.3366	0.3989	38737	2.669	0.007616	+++	0
brainstem	pallidum	rs10217651	9	118923652	a	g	0.3857	34299	3.11057	0.00186727	+++	54.7	0.8116	769	-1.859	0.06305	0.7083	341	1.896	0.05796	0.3981	35409	2.974	0.002944	+-+	74.6
brainstem	putamen	rs10217651	9	118923652	a	g	0.3878	37457	1.43121	0.152369	-++	53.7	0.8116	769	-1.079	0.2804	0.7083	341	-0.376	0.707	0.3991	38567	1.223	0.2214	+--	0
brainstem	thalamus	rs10217651	9	118923652	a	g	0.3856	34350	-0.953638	0.340267	-+-	21.9	0.8116	769	-0.506	0.6132	0.7083	341	-1.807	0.07083	0.3979	35460	-1.19	0.234	---	33.6
brainstem	accumbens	rs869640	5	65015128	a	c	0.7206	32562	-3.23853	0.00120145	---	14.4	0.8395	85	0.0786787	0.9373	0.8484	341	0.123	0.9021	0.7222	32988	-3.201	0.001369	-++	0
brainstem	amygdala	rs869640	5	65015128	a	c	0.7208	34431	-0.0229222	0.981712	-+-	29.8	0.8611	498	0.333	0.739	0.8484	341	-0.724	0.4689	0.724	35270	-0.054	0.9567	-+-	0
brainstem	brainstem	rs869640	5	65015128	a	c	0.719	28809	-8.40289	4.36e-17	---	9.5	0.8395	85	0.062	0.9502	0.8484	341	0.859	0.3904	0.7209	29235	-8.245	1.65e-16	-++	40.6
brainstem	caudate	rs869640	5	65015128	a	c	0.7209	37741	-0.652699	0.51395	-+-	46.2	0.8611	498	0.864	0.3879	0.8484	341	0.237	0.8129	0.7238	38580	-0.525	0.5994	-++	0
brainstem	pallidum	rs869640	5	65015128	a	c	0.7207	34413	-2.61387	0.00895221	-+-	73.3	0.8611	498	0.115	0.9084	0.8484	341	-0.481	0.6303	0.7239	35252	-2.616	0.00889	-+-	0
brainstem	putamen	rs869640	5	65015128	a	c	0.7206	37571	-1.67291	0.094345	---	0	0.8611	498	0.873	0.3829	0.8484	341	1.462	0.1437	0.7236	38410	-1.417	0.1564	-++	45.8
brainstem	thalamus	rs869640	5	65015128	a	c	0.7208	34464	-3.00282	0.00267493	-+-	78.1	0.8611	498	0.008	0.9933	0.8484	341	0.755	0.4502	0.724	35303	-2.892	0.003831	-++	0
brainstem	accumbens	rs9398173	6	109000316	t	c	0.3346	32562	-2.56699	0.0102587	---	0	0.7517	85	-1.651	0.09878	0.3423	341	-0.534	0.5933	0.3358	32988	-2.688	0.007178	---	15.7
brainstem	amygdala	rs9398173	6	109000316	t	c	0.3359	34431	-1.87165	0.0612554	+--	47.5	0.8063	769	-0.286	0.7749	0.3423	341	0.175	0.8612	0.3461	35541	-1.867	0.06188	--+	0
brainstem	brainstem	rs9398173	6	109000316	t	c	0.3296	28809	-7.95449	1.8e-15	---	19	0.7517	85	-0.776	0.4375	0.3423	341	-3.023	0.002505	0.331	29235	-8.265	1.4e-16	---	57.5
brainstem	caudate	rs9398173	6	109000316	t	c	0.3372	37741	-0.622986	0.533294	--+	0	0.8063	769	-2.127	0.03342	0.3423	341	-0.828	0.4077	0.3465	38851	-0.991	0.3218	---	56.7
brainstem	pallidum	rs9398173	6	109000316	t	c	0.3359	34413	-3.89394	9.86e-05	---	0	0.8063	769	-1.986	0.04702	0.3423	341	-1.449	0.1472	0.3461	35523	-4.267	1.98e-05	---	33.4
brainstem	putamen	rs9398173	6	109000316	t	c	0.3374	37571	-2.86143	0.00421741	---	0	0.8063	769	-0.774	0.4392	0.3423	341	-0.693	0.4884	0.3468	38681	-2.994	0.002752	---	0
brainstem	thalamus	rs9398173	6	109000316	t	c	0.336	34464	-2.88969	0.00385621	---	0	0.8063	769	0.262	0.7933	0.3423	341	-3.03	0.002445	0.3462	35574	-3.102	0.00192	-+-	74.9
brainstem	accumbens	rs10792032	11	68984602	a	g	0.4859	32401	-0.260275	0.794652	-+-	0	0.5235	85	0.345577	0.7298	0.1254	341	-0.992	0.3213	0.4823	32827	-0.342	0.7323	-+-	0
brainstem	amygdala	rs10792032	11	68984602	a	g	0.4871	34270	0.93981	0.347315	+-+	35.8	0.5369	498	-1.158	0.2467	0.1254	341	-0.447	0.6552	0.4843	35109	0.747	0.4553	+--	0
brainstem	brainstem	rs10792032	11	68984602	a	g	0.4914	28648	7.75157	9.08e-15	+++	39.4	0.5235	85	1.129	0.259	0.1254	341	-0.447	0.6552	0.4872	29074	7.707	1.29e-14	++-	7.4
brainstem	caudate	rs10792032	11	68984602	a	g	0.4871	34281	-1.03105	0.302519	+--	19.5	0.5369	498	-1.215	0.2244	0.1254	341	-0.411	0.6811	0.4843	35120	-1.204	0.2287	---	0
brainstem	pallidum	rs10792032	11	68984602	a	g	0.4871	34252	0.596234	0.551019	++-	0	0.5369	498	0.364	0.7161	0.1254	341	-2.664	0.007722	0.4843	35091	0.37	0.7115	++-	73.1
brainstem	putamen	rs10792032	11	68984602	a	g	0.4871	34272	-0.412485	0.679984	-+-	0	0.5369	498	-0.165	0.8687	0.1254	341	-0.975	0.3296	0.4843	35111	-0.523	0.6008	---	0
brainstem	thalamus	rs10792032	11	68984602	a	g	0.4871	34303	0.140912	0.887939	-++	0	0.5369	498	-0.27	0.7873	0.1254	341	-1.245	0.213	0.4843	35142	-0.016	0.9876	+--	0
brainstem	accumbens	rs4396983	4	15132604	a	g	0.4389	32400	-1.24475	0.213224	---	0	0.3991	85	-1.27429	0.2024	0.1681	341	-2.012	0.04423	0.436	32826	-1.507	0.1319	---	59.6
brainstem	amygdala	rs4396983	4	15132604	a	g	0.439	34232	0.439508	0.660293	+-+	0	0.4101	769	1.066	0.2862	0.1681	341	-1.643	0.1004	0.4358	35342	0.428	0.6683	++-	48
brainstem	brainstem	rs4396983	4	15132604	a	g	0.4382	28809	-7.01709	2.27e-12	---	73.6	0.3991	85	-1.523	0.1278	0.1681	341	-1.113	0.2659	0.4349	29235	-7.168	7.61e-13	---	0
brainstem	caudate	rs4396983	4	15132604	a	g	0.438	37542	2.07992	0.0375327	+++	0	0.4101	769	-0.878	0.38	0.1681	341	-1.189	0.2346	0.4351	38652	1.814	0.06962	+--	37.8
brainstem	pallidum	rs4396983	4	15132604	a	g	0.439	34214	-1.20143	0.229586	---	0	0.4101	769	0.145	0.885	0.1681	341	-0.26	0.7947	0.4358	35324	-1.187	0.2354	-+-	0
brainstem	putamen	rs4396983	4	15132604	a	g	0.438	37372	0	1	-+-	56.7	0.4101	769	-1.121	0.2623	0.1681	341	-1.972	0.0486	0.4351	38482	-0.344	0.7308	0--	60.2
brainstem	thalamus	rs4396983	4	15132604	a	g	0.439	34265	-0.243123	0.80791	+--	67.9	0.4101	769	-1.082	0.2794	0.1681	341	-0.822	0.4109	0.4358	35375	-0.479	0.6316	---	0
brainstem	accumbens	rs9322194	6	149920249	t	c	0.3368	31932	0.953679	0.340246	++-	2.8	0.405	85	0.548249	0.5837	0.8507	341	0.126	0.8994	0.3424	32358	0.988	0.3229	+++	0
brainstem	amygdala	rs9322194	6	149920249	t	c	0.3375	33802	2.56529	0.0103089	+++	0	0.4358	769	0.107	0.9146	0.8507	341	1.535	0.1249	0.3447	34912	2.692	0.007108	+++	0
brainstem	brainstem	rs9322194	6	149920249	t	c	0.3368	28156	6.90722	4.94e-12	+++	0	0.405	85	0.738	0.4607	0.8507	341	-1.697	0.08979	0.3431	28582	6.71	1.94e-11	++-	67.2
brainstem	caudate	rs9322194	6	149920249	t	c	0.3388	37111	0.305055	0.760324	-++	0	0.4358	769	1.177	0.2394	0.8507	341	0.9	0.3681	0.3453	38221	0.552	0.5806	+++	0
brainstem	pallidum	rs9322194	6	149920249	t	c	0.3376	33783	2.49045	0.0127583	+++	0	0.4358	769	-1.319	0.1871	0.8507	341	-1.325	0.1851	0.3448	34893	2.124	0.0337	+--	61.5
brainstem	putamen	rs9322194	6	149920249	t	c	0.3389	36941	2.09039	0.0365829	+++	11.1	0.4358	769	-0.997	0.3188	0.8507	341	-0.069	0.9449	0.3454	38051	1.911	0.05595	+--	0
brainstem	thalamus	rs9322194	6	149920249	t	c	0.3375	33834	3.43845	0.000585045	+++	0	0.4358	769	-1.18	0.2378	0.8507	341	-1.044	0.2964	0.3447	34944	3.105	0.001902	+--	57.1
brainstem	accumbens	rs7972561	12	107139983	a	t	0.3284	32562	-1.28349	0.199319	---	0	0.3499	85	-2.3767	0.01747	0.3505	341	-1.596	0.1105	0.3287	32988	-1.558	0.1192	---	73
brainstem	amygdala	rs7972561	12	107139983	a	t	0.3284	34431	-2.44969	0.0142981	---	17.6	0.3653	769	-1.272	0.2034	0.3505	341	-1.782	0.0747	0.3294	35541	-2.773	0.005558	---	35.6
brainstem	brainstem	rs7972561	12	107139983	a	t	0.3298	28809	6.90425	5.05e-12	+++	0	0.3499	85	0.185	0.8535	0.3505	341	-0.275	0.7837	0.3301	29235	6.834	8.25e-12	++-	0
brainstem	caudate	rs7972561	12	107139983	a	t	0.3322	37741	-1.44208	0.14928	+--	36.5	0.3653	769	-2.258	0.02393	0.3505	341	-0.899	0.3688	0.333	38851	-1.823	0.06827	---	57.1
brainstem	pallidum	rs7972561	12	107139983	a	t	0.3285	34413	1.27011	0.204046	+++	0	0.3653	769	-0.212	0.8324	0.3505	341	-0.936	0.3493	0.3295	35523	1.127	0.2596	+--	0
brainstem	putamen	rs7972561	12	107139983	a	t	0.3321	37571	-1.18852	0.23463	---	0	0.3653	769	-1.264	0.2061	0.3505	341	-0.444	0.6571	0.3329	38681	-1.391	0.1641	---	0
brainstem	thalamus	rs7972561	12	107139983	a	t	0.3283	34464	0.70853	0.478616	-++	64.8	0.3653	769	-1.786	0.07414	0.3505	341	-0.676	0.499	0.3293	35574	0.369	0.7124	+--	50.2
brainstem	accumbens	rs2206656	20	49130119	c	g	0.6104	32562	-1.76232	0.0780154	--+	0	0.4189	85	-0.390072	0.6966	0.6992	341	-1.24	0.2149	0.6108	32988	-1.897	0.05786	---	0
brainstem	amygdala	rs2206656	20	49130119	c	g	0.61	34431	-0.927851	0.353485	--+	44.4	0.4715	769	-0.624	0.5324	0.6992	341	-2.874	0.004056	0.6079	35541	-1.287	0.1982	---	74.5
brainstem	brainstem	rs2206656	20	49130119	c	g	0.6133	28809	6.83397	8.26e-12	+++	0	0.4189	85	1.779	0.07527	0.6992	341	0.142	0.8868	0.6137	29235	6.895	5.38e-12	+++	14.6
brainstem	caudate	rs2206656	20	49130119	c	g	0.61	37741	-1.97295	0.0485008	---	0	0.4715	769	-0.343	0.7316	0.6992	341	-0.091	0.9275	0.608	38851	-2.001	0.04536	---	0
brainstem	pallidum	rs2206656	20	49130119	c	g	0.6101	34413	1.51597	0.129528	+++	0	0.4715	769	0.551	0.5816	0.6992	341	-0.782	0.4341	0.608	35523	1.497	0.1345	++-	0
brainstem	putamen	rs2206656	20	49130119	c	g	0.6102	37571	0.453434	0.650237	+-+	0	0.4715	769	-0.345	0.7297	0.6992	341	-0.492	0.6225	0.6082	38681	0.352	0.7249	+--	0
brainstem	thalamus	rs2206656	20	49130119	c	g	0.61	34464	1.84079	0.0656525	+++	0	0.4715	769	0.687	0.4918	0.6992	341	-0.333	0.7391	0.6079	35574	1.88	0.06007	++-	0
brainstem	accumbens	rs12479469	20	61145196	a	g	0.3344	30106	-0.381472	0.702853	-++	69.4	0.3824	85	-2.16267	0.03056	0.4618	130	0.61	0.5418	0.3351	30321	-0.455	0.6493	--+	59.9
brainstem	amygdala	rs12479469	20	61145196	a	g	0.3338	31975	-1.1501	0.250104	-+-	23.2	0.3678	769	0.827	0.4084	0.4618	130	-0.612	0.5405	0.3351	32874	-1.046	0.2954	-+-	0
brainstem	brainstem	rs12479469	20	61145196	a	g	0.3346	25822	-6.79536	1.08e-11	---	65.6	0.3824	85	-0.84	0.4008	0.4618	130	0.442	0.6585	0.3354	26037	-6.784	1.17e-11	--+	0
brainstem	caudate	rs12479469	20	61145196	a	g	0.3373	35285	-0.0297132	0.976296	--+	0	0.3678	769	0.56	0.5757	0.4618	130	0.696	0.4865	0.3384	36184	0.094	0.9251	-++	0
brainstem	pallidum	rs12479469	20	61145196	a	g	0.3337	31957	-0.942627	0.345872	-+-	32.5	0.3678	769	1.132	0.2578	0.4618	130	-0.817	0.4142	0.335	32856	-0.808	0.4192	-+-	8.4
brainstem	putamen	rs12479469	20	61145196	a	g	0.3373	35103	0.224719	0.822198	-++	55.3	0.3678	769	0.297	0.7666	0.4618	130	1.191	0.2336	0.3384	36002	0.337	0.7362	+++	0
brainstem	thalamus	rs12479469	20	61145196	a	g	0.3338	32008	-3.46426	0.000531702	---	48	0.3678	769	1.063	0.2878	0.4618	130	0.278	0.781	0.3351	32907	-3.237	0.001209	-++	26.8
brainstem	accumbens	rs4784256	16	52814559	a	g	0.3982	32562	0.267229	0.789293	-++	0	NA	NA	NA	NA	0.4221	341	-0.286	0.775	0.3984	32903	0.237	0.8129	+?-	0
brainstem	amygdala	rs4784256	16	52814559	a	g	0.399	34431	-0.0438512	0.965023	+--	72.2	0.086	684	-1.29	0.197	0.4221	341	0.489	0.6246	0.3932	35456	-0.174	0.8615	--+	0
brainstem	brainstem	rs4784256	16	52814559	a	g	0.3989	28809	6.75676	1.41e-11	+++	0	NA	NA	NA	NA	0.4221	341	0.982	0.326	0.3992	29150	6.823	8.89e-12	+?+	0
brainstem	caudate	rs4784256	16	52814559	a	g	0.4011	37741	0.304065	0.761079	-++	18.3	0.086	684	-0.319	0.7494	0.4221	341	-0.749	0.4537	0.3957	38766	0.187	0.8514	+--	0
brainstem	pallidum	rs4784256	16	52814559	a	g	0.3989	34413	1.82553	0.0679209	+++	0	0.086	684	1.464	0.1431	0.4221	341	-0.266	0.7899	0.3931	35438	1.976	0.04813	++-	0
brainstem	putamen	rs4784256	16	52814559	a	g	0.4011	37571	-0.241698	0.809014	-+-	0	0.086	684	0.949	0.3427	0.4221	341	0.654	0.5132	0.3957	38596	-0.051	0.9596	-++	0
brainstem	thalamus	rs4784256	16	52814559	a	g	0.399	34464	0.450522	0.652334	++-	50.9	0.086	684	2.412	0.01586	0.4221	341	0.431	0.6665	0.3932	35489	0.821	0.4116	+++	63.9
brainstem	accumbens	rs555925	3	193544359	t	g	0.4072	32400	-0.559293	0.575962	-+-	0	0.5533	85	-1.7891	0.07368	0.4395	341	1.216	0.2239	0.4079	32826	-0.523	0.6012	--+	57.6
brainstem	amygdala	rs555925	3	193544359	t	g	0.4068	34232	1.16903	0.242391	+++	0	0.5641	769	-1.936	0.05288	0.4395	341	1.222	0.2218	0.4105	35342	0.985	0.3246	+-+	64.5
brainstem	brainstem	rs555925	3	193544359	t	g	0.4081	27934	6.37072	1.88e-10	+++	62.9	0.5533	85	-0.432	0.6657	0.4395	341	-0.451	0.6518	0.4089	28360	6.25	4.12e-10	+--	0
brainstem	caudate	rs555925	3	193544359	t	g	0.4056	37542	-0.218887	0.826738	-++	0	0.5641	769	-0.776	0.4379	0.4395	341	1.01	0.3127	0.4091	38652	-0.23	0.8178	--+	0
brainstem	pallidum	rs555925	3	193544359	t	g	0.4067	34214	0.622114	0.533867	-++	42	0.5641	769	1.101	0.2707	0.4395	341	-0.401	0.6881	0.4104	35324	0.735	0.4621	++-	0
brainstem	putamen	rs555925	3	193544359	t	g	0.4057	37372	1.63596	0.101849	+++	0	0.5641	769	-0.623	0.5334	0.4395	341	0.737	0.461	0.4092	38482	1.594	0.111	+-+	0
brainstem	thalamus	rs555925	3	193544359	t	g	0.4069	34265	1.19478	0.232175	-++	71.2	0.5641	769	-0.214	0.8307	0.4395	341	-0.522	0.602	0.4106	35375	1.093	0.2743	+--	0
brainstem	accumbens	rs12313279	12	102846504	a	g	0.2953	32562	-2.84316	0.00446693	---	56.7	0.3883	85	0.1058	0.9158	0.5426	341	-0.658	0.5104	0.2981	32988	-2.886	0.003898	-+-	0
brainstem	amygdala	rs12313279	12	102846504	a	g	0.2946	34431	-3.17722	0.00148696	---	0	0.3614	769	-0.207	0.8361	0.5426	341	-1.535	0.1247	0.2984	35541	-3.308	0.0009396	---	0
brainstem	brainstem	rs12313279	12	102846504	a	g	0.293	28809	6.20739	5.39e-10	+++	24.9	0.3883	85	-1.054	0.2919	0.5426	341	-1.486	0.1372	0.2962	29235	5.945	2.77e-09	+--	69.3
brainstem	caudate	rs12313279	12	102846504	a	g	0.294	37741	-1.87787	0.0603987	---	0	0.3614	769	-0.384	0.7011	0.5426	341	-0.811	0.4171	0.2975	38851	-1.981	0.04761	---	0
brainstem	pallidum	rs12313279	12	102846504	a	g	0.2945	34413	0.287665	0.773603	-+-	0	0.3614	769	1.283	0.1996	0.5426	341	-0.451	0.652	0.2983	35523	0.428	0.6689	++-	0
brainstem	putamen	rs12313279	12	102846504	a	g	0.294	37571	-1.87865	0.0602919	---	26.6	0.3614	769	0.511	0.6092	0.5426	341	-1.338	0.1808	0.2975	38681	-1.905	0.05677	-+-	0
brainstem	thalamus	rs12313279	12	102846504	a	g	0.2946	34464	0.201445	0.840351	-+-	48.6	0.3614	769	0.302	0.7626	0.5426	341	0.22	0.8255	0.2984	35574	0.264	0.7916	+++	0
brainstem	accumbens	rs9505301	6	7887131	a	g	0.8918	32282	0.60797	0.543207	++-	0	0.6412	85	0.824272	0.4097	0.8447	341	0.064	0.9489	0.8907	32708	0.653	0.514	+++	0
brainstem	amygdala	rs9505301	6	7887131	a	g	0.8917	34114	-0.653781	0.513253	---	0	0.6488	769	1.393	0.1636	0.8447	341	-1.484	0.1377	0.8859	35224	-0.584	0.5595	-+-	52.7
brainstem	brainstem	rs9505301	6	7887131	a	g	0.8921	28691	-6.05396	1.41e-09	---	43.2	0.6412	85	-1.641	0.1009	0.8447	341	-1.52	0.1284	0.8908	29117	-6.263	3.78e-10	---	17.8
brainstem	caudate	rs9505301	6	7887131	a	g	0.8929	37424	0.174317	0.861616	+--	59.5	0.6488	769	0.093	0.926	0.8447	341	-1.751	0.07996	0.8876	38534	0.02	0.9839	++-	35.6
brainstem	pallidum	rs9505301	6	7887131	a	g	0.8918	34096	-1.67125	0.094673	---	0	0.6488	769	-1.778	0.07542	0.8447	341	-0.706	0.48	0.886	35206	-1.977	0.04805	---	21.4
brainstem	putamen	rs9505301	6	7887131	a	g	0.8929	37254	-0.401498	0.688053	-+-	0	0.6488	769	-0.346	0.7294	0.8447	341	0.685	0.4932	0.8876	38364	-0.38	0.7039	--+	0
brainstem	thalamus	rs9505301	6	7887131	a	g	0.8917	34147	-1.34065	0.180034	---	0	0.6488	769	-1.873	0.06103	0.8447	341	-1.362	0.1732	0.8859	35257	-1.73	0.08363	---	52
brainstem	accumbens	rs11684404	2	88924622	t	c	0.6635	32562	0.531477	0.595088	+-+	0	0.8706	85	-0.0817324	0.9349	0.4408	341	0.628	0.5303	0.6617	32988	0.588	0.5567	+-+	0
brainstem	amygdala	rs11684404	2	88924622	t	c	0.6637	34431	-0.513258	0.607771	+-+	0	0.8913	769	0.347	0.7288	0.4408	341	1.354	0.1759	0.6665	35541	-0.322	0.7478	-++	5.3
brainstem	brainstem	rs11684404	2	88924622	t	c	0.663	28809	-5.94706	2.73e-09	---	0	0.8706	85	0.111	0.9117	0.4408	341	0.269	0.7876	0.661	29235	-5.868	4.4e-09	-++	0
brainstem	caudate	rs11684404	2	88924622	t	c	0.6667	37741	1.60253	0.109038	+-+	45.2	0.8913	769	-0.399	0.6898	0.4408	341	-0.503	0.6147	0.6692	38851	1.476	0.1399	+--	0
brainstem	pallidum	rs11684404	2	88924622	t	c	0.6638	34413	-2.07239	0.0382295	---	0	0.8913	769	-0.846	0.3975	0.4408	341	0.934	0.3502	0.6666	35523	-2.073	0.0382	--+	0
brainstem	putamen	rs11684404	2	88924622	t	c	0.6669	37571	1.51511	0.129745	+-+	31.2	0.8913	769	-0.051	0.959	0.4408	341	2.039	0.04142	0.6694	38681	1.677	0.09346	+-+	45.1
brainstem	thalamus	rs11684404	2	88924622	t	c	0.6637	34464	-1.69988	0.0891541	---	31.9	0.8913	769	-0.403	0.6872	0.4408	341	2.334	0.01962	0.6665	35574	-1.504	0.1326	--+	67.9
brainstem	accumbens	rs112178027	17	27564013	t	c	0.1646	32562	0.150006	0.88076	++-	0	0.2017	85	-0.837891	0.4023	0.5096	341	1.073	0.2831	0.1683	32988	0.216	0.8293	+-+	0
brainstem	amygdala	rs112178027	17	27564013	t	c	0.1667	34431	-2.63605	0.00838767	---	0	0.1678	769	-0.631	0.5281	0.5096	341	-0.89	0.3736	0.17	35541	-2.775	0.005528	---	0
brainstem	brainstem	rs112178027	17	27564013	t	c	0.1705	28809	-5.89855	3.67e-09	---	0	0.2017	85	-2.267	0.02338	0.5096	341	-1.662	0.09657	0.1745	29235	-6.157	7.41e-10	---	58.2
brainstem	caudate	rs112178027	17	27564013	t	c	0.1667	34442	1.41435	0.15726	+++	0	0.1678	769	-2.418	0.01559	0.5096	341	-0.279	0.7804	0.17	35552	1.009	0.3129	+--	71
brainstem	pallidum	rs112178027	17	27564013	t	c	0.1667	34413	-0.803273	0.421817	--+	0	0.1702	498	-0.415	0.6781	0.5096	341	-0.869	0.3847	0.1701	35252	-0.928	0.3532	---	0
brainstem	putamen	rs112178027	17	27564013	t	c	0.1665	34272	-0.814982	0.415083	--+	0	0.1678	769	-1.105	0.2692	0.5096	341	-0.001	0.9988	0.1698	35382	-0.965	0.3345	---	0
brainstem	thalamus	rs112178027	17	27564013	t	c	0.1667	34464	-2.17818	0.0293923	---	0	0.1678	769	-1.564	0.1179	0.5096	341	-2.787	0.005317	0.17	35574	-2.647	0.008128	---	74.9
caudate	accumbens	rs3133370	11	92026446	t	c	0.667	32562	2.00273	0.0452067	+++	0	0.6118	85	1.30079	0.1933	0.5147	341	1.215	0.2244	0.6653	32988	2.179	0.02931	+++	17.7
caudate	amygdala	rs3133370	11	92026446	t	c	0.6671	34431	0.771382	0.440481	++-	0	0.5424	769	1.239	0.2152	0.5147	341	0.643	0.5201	0.6629	35541	1.005	0.3151	+++	0
caudate	brainstem	rs3133370	11	92026446	t	c	0.6652	28809	-1.30166	0.193032	-+-	40.5	0.6118	85	0.118	0.9064	0.5147	341	0.825	0.4092	0.6633	29235	-1.197	0.2314	-++	0
caudate	caudate	rs3133370	11	92026446	t	c	0.668	37741	7.51743	5.59e-14	+++	44.9	0.5424	769	-0.553	0.5803	0.5147	341	1.219	0.223	0.6642	38851	7.446	9.65e-14	+-+	30.2
caudate	pallidum	rs3133370	11	92026446	t	c	0.6671	34413	0.0925705	0.926245	++-	20	0.5424	769	-0.533	0.5944	0.5147	341	0.576	0.5643	0.6629	35523	0.069	0.9448	+-+	0
caudate	putamen	rs3133370	11	92026446	t	c	0.668	37571	-5.13858	2.77e-07	---	41.3	0.5424	769	-1.594	0.111	0.5147	341	1.889	0.05889	0.6642	38681	-5.112	3.19e-07	--+	68.7
caudate	thalamus	rs3133370	11	92026446	t	c	0.667	34464	-1.55996	0.11877	+--	0	0.5424	769	0.317	0.7513	0.5147	341	0.754	0.4509	0.6628	35574	-1.415	0.1571	-++	0
caudate	accumbens	rs6060983	20	30420924	t	c	0.6999	32562	2.22128	0.0263322	++-	74.8	0.3362	85	0.222231	0.8241	NA	NA	NA	NA	0.699	32647	2.23	0.02577	++?	0
caudate	amygdala	rs6060983	20	30420924	t	c	0.6994	34431	-1.00658	0.314135	---	0	0.3094	769	-0.309	0.757	NA	NA	NA	NA	0.6909	35200	-1.041	0.2978	--?	0
caudate	brainstem	rs6060983	20	30420924	t	c	0.7	28809	1.17298	0.240804	++-	0	0.3362	85	-2.178	0.02944	NA	NA	NA	NA	0.6989	28894	1.053	0.2923	+-?	80
caudate	caudate	rs6060983	20	30420924	t	c	0.6992	37741	7.03806	1.95e-12	+++	0	0.3094	769	0.911	0.3622	NA	NA	NA	NA	0.6914	38510	7.096	1.28e-12	++?	0
caudate	pallidum	rs6060983	20	30420924	t	c	0.6994	34413	5.73141	9.96e-09	+++	0	0.3094	769	0.256	0.7981	NA	NA	NA	NA	0.6909	35182	5.706	1.16e-08	++?	0
caudate	putamen	rs6060983	20	30420924	t	c	0.699	37571	8.14183	3.89e-16	+++	0	0.3094	769	-0.699	0.4848	NA	NA	NA	NA	0.6912	38340	7.961	1.71e-15	+-?	70.6
caudate	thalamus	rs6060983	20	30420924	t	c	0.6993	34464	1.17195	0.241216	++-	14.7	0.3094	769	-0.43	0.6672	NA	NA	NA	NA	0.6908	35233	1.096	0.2733	+-?	0
caudate	accumbens	rs7040561	9	128528978	a	t	0.8452	32182	-0.225505	0.821586	-++	30	NA	NA	NA	NA	0.8629	211	-0.292	0.7701	0.8453	32393	-0.248	0.8039	-?-	0
caudate	amygdala	rs7040561	9	128528978	a	t	0.8459	34038	0.440505	0.659572	-++	14.6	0.9674	413	-1.1	0.2712	0.8629	211	0.523	0.6012	0.8475	34662	0.357	0.7209	+-+	0
caudate	brainstem	rs7040561	9	128528978	a	t	0.845	28530	-1.34818	0.177599	-+-	0	NA	NA	NA	NA	0.8629	211	0.148	0.8821	0.8451	28741	-1.331	0.1833	-?+	0
caudate	caudate	rs7040561	9	128528978	a	t	0.8458	34049	-6.26056	3.84e-10	---	0	0.9674	413	0.259	0.7954	0.8629	211	-0.021	0.9831	0.8474	34673	-6.177	6.52e-10	-+-	0
caudate	pallidum	rs7040561	9	128528978	a	t	0.8458	34020	0.589266	0.555683	-++	0	0.9674	413	0.106	0.9157	0.8629	211	0.931	0.3519	0.8474	34644	0.668	0.504	+++	0
caudate	putamen	rs7040561	9	128528978	a	t	0.8458	34040	3.06317	0.00219003	+++	0	0.9674	413	1.18	0.238	0.8629	211	0.451	0.652	0.8474	34664	3.199	0.001377	+++	0
caudate	thalamus	rs7040561	9	128528978	a	t	0.8458	34071	-0.245108	0.806373	-+-	0	0.9674	413	-0.854	0.3932	0.8629	211	0.349	0.7271	0.8474	34695	-0.309	0.7574	--+	0
caudate	accumbens	rs2817145	1	3133422	a	t	0.1883	30456	3.48391	0.000494148	+++	58.7	0.2542	85	-0.791696	0.4288	0.4741	341	0.703	0.4818	0.193	30882	3.575	0.0003499	+++	0
caudate	amygdala	rs2817145	1	3133422	a	t	0.1904	32288	0.954759	0.339699	-++	0	0.7995	769	0.729	0.4663	0.4741	341	1.588	0.1123	0.2073	33398	1.21	0.2264	+++	20
caudate	brainstem	rs2817145	1	3133422	a	t	0.1887	26865	3.97229	7.12e-05	+++	0	0.7458	85	-1.159	0.2463	0.4741	341	0.541	0.5882	0.194	27291	3.937	8.25e-05	+-+	0
caudate	caudate	rs2817145	1	3133422	a	t	0.1919	35598	6.19817	5.71e-10	+++	65.3	0.7995	769	-0.043	0.9658	0.4741	341	0.762	0.4459	0.2073	36708	6.171	6.79e-10	+-+	0
caudate	pallidum	rs2817145	1	3133422	a	t	0.1904	32270	2.29336	0.0218273	+++	0	0.7995	769	0.564	0.5729	0.4741	341	-1.972	0.0486	0.2073	33380	2.141	0.03226	++-	59
caudate	putamen	rs2817145	1	3133422	a	t	0.1918	35428	2.31211	0.0207715	+++	71.2	0.7995	769	0.674	0.5004	0.4741	341	0.466	0.6416	0.2072	36538	2.419	0.01554	+++	0
caudate	thalamus	rs2817145	1	3133422	a	t	0.1903	32321	1.86758	0.0618204	+++	22	0.7995	769	-1.056	0.2912	0.4741	341	0.219	0.827	0.2072	33431	1.698	0.08945	+-+	0
caudate	accumbens	rs148470213	14	56193700	t	c	0.5436	24250	5.17768	2.25e-07	++?	0	0.1495	85	0.41862	0.6754	0.261	341	-0.97	0.332	0.5383	24676	5.043	4.58e-07	++-	19.7
caudate	amygdala	rs148470213	14	56193700	t	c	0.5441	26119	1.84275	0.0653662	++?	0	0.1616	769	-0.46	0.6455	0.261	341	0.576	0.5648	0.5298	27229	1.792	0.07315	+-+	0
caudate	brainstem	rs148470213	14	56193700	t	c	0.5466	20497	-0.034645	0.972363	+-?	0	0.1495	85	-0.779	0.4359	0.261	341	0.977	0.3286	0.5403	20923	0.041	0.9675	--+	0
caudate	caudate	rs148470213	14	56193700	t	c	0.5436	29429	6.17836	6.48e-10	++?	0	0.1616	769	2.148	0.03171	0.261	341	0.343	0.7318	0.5308	30539	6.442	1.18e-10	+++	0
caudate	pallidum	rs148470213	14	56193700	t	c	0.5441	26101	6.81439	9.47e-12	++?	40.8	0.1616	769	1.547	0.1218	0.261	341	1.075	0.2824	0.5297	27211	7.054	1.73e-12	+++	0
caudate	putamen	rs148470213	14	56193700	t	c	0.5436	29259	12.801	1.62e-37	++?	65.3	0.1616	769	3.313	0.0009218	0.261	341	1.288	0.1977	0.5308	30369	13.229	6e-40	+++	0
caudate	thalamus	rs148470213	14	56193700	t	c	0.5441	26152	0.32648	0.744062	+-?	48.6	0.1616	769	0.925	0.355	0.261	341	0.126	0.8998	0.5298	27262	0.489	0.6247	+++	0
caudate	accumbens	rs1987471	16	28825866	t	g	0.6235	32562	3.90313	9.5e-05	+++	0	0.7572	85	0.327021	0.7436	0.8326	211	1.145	0.2521	0.6252	32858	3.994	6.5e-05	+++	0
caudate	amygdala	rs1987471	16	28825866	t	g	0.6267	34431	1.71817	0.085766	-++	36.9	0.7373	769	0.196	0.8447	0.8326	211	1.298	0.1942	0.6303	35411	1.823	0.06826	+++	0
caudate	brainstem	rs1987471	16	28825866	t	g	0.6252	28809	-1.6788	0.0931917	---	0	0.7572	85	-0.652	0.5141	0.8326	211	-0.664	0.507	0.6271	29105	-1.762	0.07807	---	0
caudate	caudate	rs1987471	16	28825866	t	g	0.6281	37741	5.86835	4.4e-09	+++	0	0.7373	769	0.62	0.535	0.8326	211	-0.035	0.9722	0.6314	38721	5.878	4.14e-09	++-	0
caudate	pallidum	rs1987471	16	28825866	t	g	0.6267	34413	0.281693	0.778179	-+-	9.7	0.7373	769	-0.094	0.9252	0.8326	211	-0.916	0.3597	0.6303	35393	0.193	0.8468	+--	0
caudate	putamen	rs1987471	16	28825866	t	g	0.6285	37571	3.94108	8.11e-05	+++	0	0.7373	769	0.809	0.4184	0.8326	211	0.286	0.775	0.6318	38551	4.026	5.67e-05	+++	0
caudate	thalamus	rs1987471	16	28825866	t	g	0.6267	34464	-1.83583	0.0663832	---	0	0.7373	769	1.59	0.1119	0.8326	211	0.434	0.6645	0.6303	35444	-1.543	0.1229	-++	46
caudate	accumbens	rs12445022	16	87575332	a	g	0.3241	32562	1.89544	0.0580345	+++	0	0.1529	85	0.408339	0.683	0.129	341	-0.675	0.4995	0.3216	32988	1.835	0.06647	++-	0
caudate	amygdala	rs12445022	16	87575332	a	g	0.3252	34431	0.74846	0.454183	-++	0	0.1473	498	1.846	0.06491	0.129	341	0.937	0.3487	0.3208	35270	1.051	0.2933	+++	46.5
caudate	brainstem	rs12445022	16	87575332	a	g	0.3261	28809	1.71146	0.0869959	++-	60.3	0.1529	85	-0.441	0.6591	0.129	341	-1.152	0.2494	0.3233	29235	1.551	0.121	+--	2.2
caudate	caudate	rs12445022	16	87575332	a	g	0.326	37741	5.86637	4.45e-09	+++	0	0.1473	498	1.273	0.203	0.129	341	-0.774	0.4391	0.322	38580	5.874	4.25e-09	++-	6
caudate	pallidum	rs12445022	16	87575332	a	g	0.3252	34413	4.11192	3.92e-05	+++	46.8	0.1473	498	-0.031	0.9752	0.129	341	-0.275	0.7832	0.3208	35252	4.032	5.53e-05	+--	0
caudate	putamen	rs12445022	16	87575332	a	g	0.326	37571	5.10362	3.33e-07	+++	52.7	0.1473	498	0.895	0.3706	0.129	341	0.572	0.5673	0.3219	38410	5.203	1.96e-07	+++	0
caudate	thalamus	rs12445022	16	87575332	a	g	0.3252	34464	1.5024	0.132994	++-	18.8	0.1473	498	-0.036	0.971	0.129	341	-0.37	0.7113	0.3208	35303	1.444	0.1488	+--	0
caudate	accumbens	rs55989340	14	100635222	a	g	0.7399	32562	-1.28747	0.197932	+--	23	0.8295	85	0.805778	0.4204	0.7424	341	-0.273	0.785	0.7402	32988	-1.266	0.2055	-+-	0
caudate	amygdala	rs55989340	14	100635222	a	g	0.7388	34431	-1.1202	0.262629	---	0	0.8188	769	1.646	0.09976	0.7424	341	0.216	0.829	0.7406	35541	-0.839	0.4013	-++	39.5
caudate	brainstem	rs55989340	14	100635222	a	g	0.7377	28809	0.00593914	0.995261	-++	58	0.8295	85	0.87	0.3843	0.7424	341	-1.17	0.2419	0.738	29235	-0.074	0.9413	++-	5.7
caudate	caudate	rs55989340	14	100635222	a	g	0.7372	37741	-5.86043	4.62e-09	---	52	0.8188	769	0.988	0.3231	0.7424	341	-1.32	0.1868	0.7389	38851	-5.761	8.37e-09	-+-	48.4
caudate	pallidum	rs55989340	14	100635222	a	g	0.739	34413	0.309564	0.756893	-+-	0	0.8188	769	0.288	0.7734	0.7424	341	-1.197	0.2315	0.7408	35523	0.23	0.8182	++-	0
caudate	putamen	rs55989340	14	100635222	a	g	0.7372	37571	-1.82372	0.0681941	---	0	0.8188	769	-1.202	0.2292	0.7424	341	-1.283	0.1996	0.7389	38681	-2.087	0.03686	---	2.9
caudate	thalamus	rs55989340	14	100635222	a	g	0.7388	34464	0.993331	0.320549	-++	0	0.8188	769	-0.725	0.4685	0.7424	341	-0.397	0.6916	0.7406	35574	0.832	0.4052	+--	0
caudate	accumbens	rs4888010	16	73895046	a	g	0.4703	32562	0.455978	0.648406	-+-	43.4	0.2757	85	-1.32133	0.1864	0.3395	341	-0.583	0.5601	0.4684	32988	0.327	0.7439	+--	8.5
caudate	amygdala	rs4888010	16	73895046	a	g	0.4694	34431	1.03449	0.300908	++-	0	0.2755	769	0.858	0.391	0.3395	341	1.697	0.08963	0.464	35541	1.311	0.19	+++	32.6
caudate	brainstem	rs4888010	16	73895046	a	g	0.4721	28809	-0.443456	0.657436	-+-	0	0.2757	85	0.797	0.4253	0.3395	341	0.957	0.3386	0.47	29235	-0.294	0.7689	-++	0
caudate	caudate	rs4888010	16	73895046	a	g	0.4694	37741	5.85845	4.67e-09	+++	74.9	0.2755	769	-0.059	0.9533	0.3395	341	0.322	0.7472	0.4644	38851	5.796	6.79e-09	+-+	0
caudate	pallidum	rs4888010	16	73895046	a	g	0.4694	34413	3.71477	0.000203392	+++	55.6	0.2755	769	-0.431	0.6665	0.3395	341	1.001	0.3171	0.464	35523	3.691	0.0002235	+-+	0
caudate	putamen	rs4888010	16	73895046	a	g	0.4693	37571	2.18827	0.0286502	++-	64.3	0.2755	769	0.75	0.4535	0.3395	341	-0.288	0.7736	0.4643	38681	2.235	0.0254	++-	0
caudate	thalamus	rs4888010	16	73895046	a	g	0.4694	34464	1.19478	0.232175	++-	0	0.2755	769	2.255	0.02416	0.3395	341	1.037	0.2997	0.464	35574	1.609	0.1076	+++	60
caudate	accumbens	rs35305377	7	99938955	a	g	0.5458	31549	-2.48851	0.0128281	---	0	0.7258	85	0.033005	0.9737	0.28	341	-0.965	0.3346	0.5434	31975	-2.57	0.01018	-+-	0
caudate	amygdala	rs35305377	7	99938955	a	g	0.5467	33418	0.20032	0.84123	--+	0	0.6663	769	0.097	0.9226	0.28	341	-1.053	0.2922	0.5467	34528	0.107	0.9149	++-	0
caudate	brainstem	rs35305377	7	99938955	a	g	0.5457	27797	-2.45682	0.0140171	--+	65.4	0.7258	85	0.641	0.5213	0.28	341	-1.04	0.2982	0.543	28223	-2.517	0.01182	-+-	0
caudate	caudate	rs35305377	7	99938955	a	g	0.5467	33429	-5.83567	5.36e-09	---	47.8	0.6663	769	-0.118	0.9063	0.28	341	0.496	0.6198	0.5467	34539	-5.709	1.13e-08	--+	0
caudate	pallidum	rs35305377	7	99938955	a	g	0.5465	33400	-2.28639	0.0222313	--+	21	0.6663	769	-0.565	0.572	0.28	341	0.682	0.495	0.5465	34510	-2.266	0.02346	--+	0
caudate	putamen	rs35305377	7	99938955	a	g	0.5467	33260	-3.50163	0.000462429	---	0	0.6663	769	-0.286	0.775	0.28	341	1.787	0.074	0.5467	34370	-3.309	0.0009349	--+	56.4
caudate	thalamus	rs35305377	7	99938955	a	g	0.5467	33451	0.621204	0.534465	-++	11.6	0.6663	769	-0.47	0.6383	0.28	341	-0.403	0.6872	0.5467	34561	0.501	0.6163	+--	0
pallidum	accumbens	rs2923447	8	42439848	t	g	0.59	32562	-0.714266	0.475063	-++	27.4	0.6552	85	-0.39604	0.6921	0.5873	341	-0.674	0.5001	0.5901	32988	-0.798	0.4247	---	0
pallidum	amygdala	rs2923447	8	42439848	t	g	0.59	34431	-0.743476	0.457193	--+	0	0.6466	769	-0.616	0.5382	0.5873	341	-0.769	0.442	0.5912	35541	-0.898	0.3694	---	0
pallidum	brainstem	rs2923447	8	42439848	t	g	0.5894	28809	3.19526	0.00139707	+++	0	0.6552	85	-0.467	0.6404	0.5873	341	-0.188	0.8508	0.5896	29235	3.126	0.00177	+--	0
pallidum	caudate	rs2923447	8	42439848	t	g	0.5898	37741	1.03501	0.300665	+++	0	0.6466	769	0.918	0.3589	0.5873	341	-0.004	0.9965	0.5909	38851	1.149	0.2506	++-	0
pallidum	pallidum	rs2923447	8	42439848	t	g	0.59	34413	8.11436	4.88e-16	+++	34	0.6466	769	0.102	0.9189	0.5873	341	-1.356	0.1751	0.5912	35523	7.869	3.58e-15	++-	65.4
pallidum	putamen	rs2923447	8	42439848	t	g	0.5902	37571	2.6387	0.00832237	+++	0	0.6466	769	-1.125	0.2607	0.5873	341	-1.192	0.2333	0.5913	38681	2.33	0.0198	+--	52.6
pallidum	thalamus	rs2923447	8	42439848	t	g	0.59	34464	2.19208	0.028374	++-	1.3	0.6466	769	-0.44	0.6599	0.5873	341	-0.697	0.4861	0.5912	35574	2.025	0.0429	+--	0
pallidum	accumbens	rs10129414	14	56193272	a	g	0.4425	32562	-5.85917	4.65e-09	---	0	0.8054	85	-0.330177	0.7413	0.7371	341	0.922	0.3566	0.4465	32988	-5.744	9.23e-09	--+	12.8
pallidum	amygdala	rs10129414	14	56193272	a	g	0.4422	34431	-2.36597	0.0179829	---	0	0.792	769	-0.199	0.8424	0.7371	341	-0.519	0.6041	0.4526	35541	-2.409	0.01601	---	0
pallidum	brainstem	rs10129414	14	56193272	a	g	0.4401	28809	0.738433	0.460251	-++	26.3	0.8054	85	1.156	0.2475	0.7371	341	-1.084	0.2782	0.4446	29235	0.678	0.4976	++-	23
pallidum	caudate	rs10129414	14	56193272	a	g	0.4427	37741	-5.96938	2.38e-09	---	32.1	0.792	769	-0.897	0.3699	0.7371	341	-0.387	0.6989	0.4522	38851	-6.046	1.49e-09	---	0
pallidum	pallidum	rs10129414	14	56193272	a	g	0.4422	34413	-7.52907	5.11e-14	---	0	0.792	769	-0.383	0.7017	0.7371	341	-1.074	0.2827	0.4526	35523	-7.572	3.67e-14	---	0
pallidum	putamen	rs10129414	14	56193272	a	g	0.4426	37571	-14.7546	2.88e-49	---	20.7	0.792	769	-1.797	0.0723	0.7371	341	-1.338	0.1809	0.4521	38681	-14.92	2.43e-50	---	0
pallidum	thalamus	rs10129414	14	56193272	a	g	0.4422	34464	-0.0972492	0.922528	-++	12.9	0.792	769	-0.752	0.4523	0.7371	341	-0.144	0.8853	0.4526	35574	-0.22	0.8256	---	0
pallidum	accumbens	rs196807	8	24682649	a	g	0.1777	32444	0.666582	0.505039	+-+	0	0.1859	85	0.6613	0.5084	0.2645	341	-0.6	0.5483	0.1786	32870	0.635	0.5256	++-	0
pallidum	amygdala	rs196807	8	24682649	a	g	0.1775	34313	0.879016	0.379392	-++	51.4	0.1795	769	0.933	0.3508	0.2645	341	-0.671	0.5019	0.1784	35423	0.937	0.3489	++-	0
pallidum	brainstem	rs196807	8	24682649	a	g	0.1735	28691	-0.121752	0.903095	--+	0	0.1859	85	0.821	0.4116	0.2645	341	-1.103	0.27	0.1746	29117	-0.196	0.8447	-+-	0
pallidum	caudate	rs196807	8	24682649	a	g	0.1775	37623	0.685384	0.493102	-++	19.7	0.1795	769	0.684	0.494	0.2645	341	0.554	0.5795	0.1783	38733	0.824	0.41	+++	0
pallidum	pallidum	rs196807	8	24682649	a	g	0.1776	34295	6.44311	1.17e-10	+++	21.1	0.1795	769	1.452	0.1465	0.2645	341	0.981	0.3265	0.1785	35405	6.652	2.9e-11	+++	0
pallidum	putamen	rs196807	8	24682649	a	g	0.1775	37453	1.78078	0.0749491	+++	0	0.1795	769	0.237	0.8129	0.2645	341	1.458	0.1448	0.1783	38563	1.926	0.05417	+++	0
pallidum	thalamus	rs196807	8	24682649	a	g	0.1775	34346	0.175644	0.860574	++-	0	0.1795	769	3.862	0.0001125	0.2645	341	0.432	0.6658	0.1784	35456	0.784	0.4331	+++	86.2
pallidum	accumbens	rs10439607	20	30258541	a	g	0.2977	32562	-2.03153	0.0422008	--+	79.6	0.7235	85	0.312259	0.7548	NA	NA	NA	NA	0.2988	32647	-2.013	0.04412	-+?	0
pallidum	amygdala	rs10439607	20	30258541	a	g	0.2983	34431	1.23082	0.218389	+++	0	0.7425	769	0.103	0.9177	NA	NA	NA	NA	0.308	35200	1.233	0.2177	++?	0
pallidum	brainstem	rs10439607	20	30258541	a	g	0.2972	28809	-1.2096	0.226431	--+	0	0.7235	85	2.6	0.009321	NA	NA	NA	NA	0.2985	28894	-1.067	0.2861	-+?	85.9
pallidum	caudate	rs10439607	20	30258541	a	g	0.2995	37741	-6.80332	1.02e-11	---	0	0.7425	769	-0.196	0.8445	NA	NA	NA	NA	0.3083	38510	-6.763	1.35e-11	--?	0
pallidum	pallidum	rs10439607	20	30258541	a	g	0.2983	34413	-6.28186	3.35e-10	---	0	0.7425	769	0.287	0.7745	NA	NA	NA	NA	0.308	35182	-6.17	6.81e-10	-+?	31.9
pallidum	putamen	rs10439607	20	30258541	a	g	0.2997	37571	-8.19976	2.41e-16	---	0	0.7425	769	-0.085	0.9324	NA	NA	NA	NA	0.3086	38340	-8.129	4.32e-16	--?	13.8
pallidum	thalamus	rs10439607	20	30258541	a	g	0.2983	34464	-1.42202	0.15502	--+	8.5	0.7425	769	0.564	0.5729	NA	NA	NA	NA	0.308	35233	-1.323	0.1858	-+?	0
pallidum	accumbens	rs4952211	2	32611512	t	c	0.4344	32401	-5.28795	1.24e-07	---	0	0.5412	85	0.721963	0.4702	0.678	341	-1.156	0.2477	0.4372	32827	-5.335	9.58e-08	-+-	0
pallidum	amygdala	rs4952211	2	32611512	t	c	0.4347	34270	-2.84235	0.0044782	---	21.9	0.5425	498	1.765	0.07762	0.678	341	-1.005	0.3151	0.4386	35109	-2.697	0.006996	-+-	59.4
pallidum	brainstem	rs4952211	2	32611512	t	c	0.4279	28648	-4.13958	3.48e-05	---	81.2	0.5412	85	0.155	0.8765	0.678	341	-0.398	0.6906	0.4312	29074	-4.144	3.42e-05	-+-	0
pallidum	caudate	rs4952211	2	32611512	t	c	0.4347	34281	-1.76793	0.077072	---	0	0.5425	498	-1.511	0.1309	0.678	341	-0.269	0.7877	0.4386	35120	-1.953	0.05081	---	0
pallidum	pallidum	rs4952211	2	32611512	t	c	0.4347	34252	-5.85683	4.72e-09	---	61.9	0.5425	498	-0.086	0.9314	0.678	341	0.102	0.9184	0.4386	35091	-5.787	7.19e-09	--+	0
pallidum	putamen	rs4952211	2	32611512	t	c	0.4347	34272	-4.27666	1.9e-05	---	0	0.5425	498	-0.374	0.7083	0.678	341	-0.569	0.5691	0.4386	35111	-4.326	1.52e-05	---	0
pallidum	thalamus	rs4952211	2	32611512	t	c	0.4348	34303	-2.15139	0.0314454	---	52.3	0.5425	498	-0.398	0.6903	0.678	341	-0.531	0.5956	0.4387	35142	-2.225	0.02606	---	0
pallidum	accumbens	rs12567402	1	21870213	t	c	0.3316	32400	2.34446	0.0190546	++-	26.8	0.1471	85	-0.104231	0.917	0.3924	341	-0.693	0.4885	0.3318	32826	2.253	0.02424	+--	0
pallidum	amygdala	rs12567402	1	21870213	t	c	0.3309	34232	0.642818	0.520342	+++	0	0.1608	769	0.666	0.5056	0.3924	341	-0.358	0.7203	0.3278	35342	0.696	0.4866	++-	0
pallidum	brainstem	rs12567402	1	21870213	t	c	0.329	28809	0.392973	0.694339	++-	3.6	0.1471	85	0.818	0.4131	0.3924	341	0.592	0.5538	0.3292	29235	0.498	0.6184	+++	0
pallidum	caudate	rs12567402	1	21870213	t	c	0.3309	34243	-1.72138	0.0851814	---	0	0.1608	769	-0.872	0.3834	0.3924	341	-2.091	0.03657	0.3278	35353	-2.028	0.04256	---	49.8
pallidum	pallidum	rs12567402	1	21870213	t	c	0.3309	34214	5.81204	6.17e-09	+++	0	0.1608	769	0.386	0.6996	0.3924	341	1.011	0.3118	0.3278	35324	5.876	4.2e-09	+++	0
pallidum	putamen	rs12567402	1	21870213	t	c	0.3308	34073	1.42023	0.155542	-++	83.9	0.1608	769	-1.004	0.3152	0.3924	341	-0.927	0.3538	0.3277	35183	1.158	0.2469	+--	21.4
pallidum	thalamus	rs12567402	1	21870213	t	c	0.331	34265	0.323502	0.746315	++-	0	0.1608	769	0.131	0.8959	0.3924	341	-0.265	0.7909	0.3279	35375	0.312	0.7553	++-	0
putamen	accumbens	rs945270	14	56200473	c	g	0.5782	32562	5.86513	4.49e-09	+++	0	0.2044	85	0.604183	0.5458	0.2669	341	-0.719	0.4724	0.574	32988	5.785	7.26e-09	++-	0
putamen	amygdala	rs945270	14	56200473	c	g	0.5785	34431	2.4168	0.0156578	+++	0	0.1916	769	-0.21	0.8336	0.2669	341	0.668	0.5039	0.5671	35541	2.413	0.01581	+-+	0
putamen	brainstem	rs945270	14	56200473	c	g	0.5804	28809	-0.885922	0.37566	+--	10.5	0.2044	85	-0.749	0.4538	0.2669	341	1.22	0.2225	0.5757	29235	-0.788	0.4306	--+	9.6
putamen	caudate	rs945270	14	56200473	c	g	0.5773	37741	5.78119	7.42e-09	+++	15.7	0.1916	769	1.402	0.161	0.2669	341	0.292	0.7701	0.5669	38851	5.923	3.17e-09	+++	0
putamen	pallidum	rs945270	14	56200473	c	g	0.5785	34413	7.42953	1.09e-13	+++	0.4	0.1916	769	0.104	0.9172	0.2669	341	1.186	0.2355	0.5671	35523	7.444	9.76e-14	+++	0
putamen	putamen	rs945270	14	56200473	c	g	0.5775	37571	15.0252	5.02e-51	+++	57.3	0.1916	769	2.555	0.01063	0.2669	341	1.451	0.1467	0.5671	38681	15.305	7.13e-53	+++	0
putamen	thalamus	rs945270	14	56200473	c	g	0.5785	34464	0.201445	0.840351	+--	0	0.1916	769	0.101	0.9192	0.2669	341	0.139	0.8892	0.5671	35574	0.227	0.8206	+++	0
putamen	accumbens	rs62098013	18	50863861	a	g	0.3855	32562	-0.822548	0.410765	+--	0	NA	NA	NA	NA	NA	NA	NA	NA	0.3855	32562	-0.823	0.4108	-??	0
putamen	amygdala	rs62098013	18	50863861	a	g	0.3856	34431	0.345826	0.729473	+--	51.6	0.0634	684	1.372	0.1702	NA	NA	NA	NA	0.3793	35115	0.534	0.5934	++?	41.7
putamen	brainstem	rs62098013	18	50863861	a	g	0.3842	28809	-0.440486	0.659585	-+-	0	NA	NA	NA	NA	NA	NA	NA	NA	0.3842	28809	-0.44	0.6596	-??	0
putamen	caudate	rs62098013	18	50863861	a	g	0.3848	37741	-2.29782	0.0215721	---	0	0.0634	684	0.433	0.6648	NA	NA	NA	NA	0.3791	38425	-2.219	0.02646	-+?	0
putamen	pallidum	rs62098013	18	50863861	a	g	0.3856	34413	0.497691	0.618702	-++	53.1	0.0634	684	-1.433	0.1518	NA	NA	NA	NA	0.3793	35097	0.293	0.7697	+-?	54.9
putamen	putamen	rs62098013	18	50863861	a	g	0.3847	37571	8.92185	4.59e-19	+++	33.9	0.0634	684	2.019	0.04349	NA	NA	NA	NA	0.379	38255	9.112	8.11e-20	++?	0
putamen	thalamus	rs62098013	18	50863861	a	g	0.3856	34464	0.0357242	0.971502	++-	0	0.0634	684	-1.55	0.1211	NA	NA	NA	NA	0.3793	35148	-0.181	0.8565	+-?	57.8
putamen	accumbens	rs6087771	20	30306724	t	c	0.7084	31282	2.56301	0.0103768	++-	81.3	0.4171	85	1.12465	0.2607	NA	NA	NA	NA	0.7076	31367	2.618	0.008842	++?	0
putamen	amygdala	rs6087771	20	30306724	t	c	0.7077	33151	-1.40922	0.158771	---	0	0.3968	769	-0.388	0.6977	NA	NA	NA	NA	0.7007	33920	-1.452	0.1466	--?	0
putamen	brainstem	rs6087771	20	30306724	t	c	0.7081	28809	0.810692	0.417542	++-	0	0.4171	85	-2.091	0.03651	NA	NA	NA	NA	0.7072	28894	0.696	0.4864	+-?	78
putamen	caudate	rs6087771	20	30306724	t	c	0.7065	36461	6.74291	1.55e-11	+++	0	0.3968	769	1.737	0.0824	NA	NA	NA	NA	0.7001	37230	6.923	4.44e-12	++?	0
putamen	pallidum	rs6087771	20	30306724	t	c	0.7077	33133	5.80706	6.36e-09	+++	0	0.3968	769	0.587	0.5569	NA	NA	NA	NA	0.7006	33902	5.829	5.57e-09	++?	0
putamen	putamen	rs6087771	20	30306724	t	c	0.7064	36291	8.68615	3.75e-18	+++	7.5	0.3968	769	0.529	0.5969	NA	NA	NA	NA	0.7	37060	8.672	4.26e-18	++?	0
putamen	thalamus	rs6087771	20	30306724	t	c	0.7077	33184	1.47561	0.140049	++-	17.8	0.3968	769	-0.137	0.8914	NA	NA	NA	NA	0.7007	33953	1.438	0.1504	+-?	0
putamen	accumbens	rs35200015	11	117383215	a	g	0.1949	32562	-0.0337761	0.973056	--+	0	0.1625	85	-1.58839	0.1122	0.2257	341	-0.127	0.8991	0.1951	32988	-0.127	0.8989	---	20.8
putamen	amygdala	rs35200015	11	117383215	a	g	0.1939	34431	-0.821213	0.411525	---	0	0.1547	769	1.128	0.2594	0.2257	341	-1.357	0.1747	0.1934	35541	-0.775	0.4381	-+-	37.3
putamen	brainstem	rs35200015	11	117383215	a	g	0.1934	28809	1.40857	0.158964	+-+	47.5	0.1625	85	-0.67	0.5029	0.2257	341	-2.052	0.04021	0.1937	29235	1.141	0.254	+--	62.6
putamen	caudate	rs35200015	11	117383215	a	g	0.1928	37741	-3.98156	6.85e-05	---	0	0.1547	769	2.476	0.01329	0.2257	341	-1.239	0.2154	0.1923	38851	-3.692	0.0002225	-+-	79.8
putamen	pallidum	rs35200015	11	117383215	a	g	0.1939	34413	-2.61089	0.00903076	+--	70.3	0.1547	769	-2.831	0.004638	0.2257	341	-1.253	0.2102	0.1934	35523	-3.109	0.001877	---	70.3
putamen	putamen	rs35200015	11	117383215	a	g	0.193	37571	-8.19476	2.51e-16	---	0	0.1603	498	-1.963	0.04962	0.2257	341	-0.845	0.398	0.1929	38410	-8.408	4.17e-17	---	0
putamen	thalamus	rs35200015	11	117383215	a	g	0.1939	34464	1.4895	0.136356	+++	0	0.1547	769	2.272	0.02309	0.2257	341	-0.952	0.3411	0.1934	35574	1.707	0.08784	++-	62.8
putamen	accumbens	rs1432054	11	83260225	a	g	0.6423	32562	-0.585122	0.558466	-++	49.2	0.7443	85	0.705004	0.4807	0.5353	341	-0.238	0.8115	0.6415	32988	-0.57	0.5688	-+-	0
putamen	amygdala	rs1432054	11	83260225	a	g	0.643	34431	-0.614913	0.538612	---	0	0.724	769	1.119	0.263	0.5353	341	1.316	0.1882	0.6437	35541	-0.312	0.7553	-++	38.8
putamen	brainstem	rs1432054	11	83260225	a	g	0.6399	28809	1.53032	0.125938	+++	0	0.7443	85	0.168	0.8664	0.5353	341	2.554	0.01066	0.639	29235	1.804	0.07123	+++	64.5
putamen	caudate	rs1432054	11	83260225	a	g	0.6433	37741	2.59891	0.00935198	+++	50.3	0.724	769	1.947	0.05148	0.5353	341	1.053	0.2921	0.6439	38851	2.934	0.003344	+++	34.4
putamen	pallidum	rs1432054	11	83260225	a	g	0.6431	34413	-3.51171	0.000445236	---	0	0.724	769	1.095	0.2734	0.5353	341	2.989	0.002798	0.6438	35523	-3.002	0.002679	-++	85.1
putamen	putamen	rs1432054	11	83260225	a	g	0.643	37571	-7.93509	2.1e-15	---	0	0.724	769	0.29	0.7719	0.5353	341	1.095	0.2737	0.6437	38681	-7.677	1.63e-14	-++	62.4
putamen	thalamus	rs1432054	11	83260225	a	g	0.6431	34464	1.28806	0.197726	+++	0	0.724	769	1.737	0.08237	0.5353	341	1.543	0.1228	0.6438	35574	1.674	0.09407	+++	53
putamen	accumbens	rs7902527	10	118715399	a	g	0.2318	32075	1.71861	0.0856856	+++	0	0.2059	85	-0.752946	0.4515	0.3046	341	0.32	0.7492	0.2325	32501	1.702	0.08884	+-+	0
putamen	amygdala	rs7902527	10	118715399	a	g	0.2322	33942	0.923864	0.355557	-++	0	0.2297	498	0.958	0.3379	0.3046	341	-1.597	0.1103	0.2329	34781	0.869	0.3847	++-	43.9
putamen	brainstem	rs7902527	10	118715399	a	g	0.2322	28809	2.73596	0.0062198	+++	0	0.2059	85	0.074	0.9412	0.3046	341	0.107	0.9146	0.233	29235	2.732	0.006304	+++	0
putamen	caudate	rs7902527	10	118715399	a	g	0.2351	37247	-0.827016	0.408228	+--	0	0.2297	498	-0.901	0.3677	0.3046	341	-1.033	0.3014	0.2357	38086	-1.019	0.3084	---	0
putamen	pallidum	rs7902527	10	118715399	a	g	0.2322	33932	3.53858	0.00040228	+++	55.2	0.2297	498	-1.011	0.3123	0.3046	341	-0.512	0.6085	0.2329	34771	3.324	0.0008874	+--	27.4
putamen	putamen	rs7902527	10	118715399	a	g	0.2352	37108	6.29214	3.13e-10	+++	0	0.2297	498	-0.337	0.7364	0.3046	341	-1.003	0.3157	0.2358	37947	6.089	1.14e-09	+--	45.1
putamen	thalamus	rs7902527	10	118715399	a	g	0.2323	33967	-0.231215	0.817148	++-	35.7	0.2297	498	-1.228	0.2195	0.3046	341	-0.254	0.7996	0.233	34806	-0.4	0.6889	---	0
putamen	accumbens	rs2244479	7	50738987	t	c	0.6466	31282	-2.98323	0.00285226	---	34.5	0.7141	85	-0.809665	0.4184	0.572	341	-1.293	0.196	0.646	31708	-3.139	0.001695	---	0
putamen	amygdala	rs2244479	7	50738987	t	c	0.6462	33151	-1.06837	0.285352	-+-	26	0.7131	769	-1.378	0.1681	0.572	341	-0.418	0.6759	0.647	34261	-1.299	0.1939	---	0
putamen	brainstem	rs2244479	7	50738987	t	c	0.6503	28809	0.437517	0.661737	-++	74.9	0.7141	85	-1.422	0.1549	0.572	341	-0.949	0.3427	0.6496	29235	0.255	0.7986	+--	34.4
putamen	caudate	rs2244479	7	50738987	t	c	0.6462	36461	-2.43747	0.0147904	---	0	0.7131	769	-1.34	0.1802	0.572	341	0.761	0.4468	0.6469	37571	-2.52	0.01172	--+	0
putamen	pallidum	rs2244479	7	50738987	t	c	0.6462	33133	-1.15365	0.248645	+--	0	0.7131	769	-0.393	0.6946	0.572	341	0.334	0.7385	0.647	34243	-1.16	0.2459	--+	0
putamen	putamen	rs2244479	7	50738987	t	c	0.6463	36291	-5.9226	3.17e-09	---	32.1	0.7131	769	-1.29	0.197	0.572	341	-0.569	0.5691	0.647	37401	-6.073	1.25e-09	---	0
putamen	thalamus	rs2244479	7	50738987	t	c	0.6462	33184	1.91819	0.0550868	+++	0	0.7131	769	-1.674	0.09415	0.572	341	-2.095	0.03617	0.647	34294	1.427	0.1535	+--	77.4
putamen	accumbens	rs2410767	5	87705268	c	g	0.781	32562	0.36359	0.716164	+-+	0	0.6121	85	0.860897	0.3891	NA	NA	NA	NA	0.7806	32647	0.407	0.684	++?	0
putamen	amygdala	rs2410767	5	87705268	c	g	0.7797	34431	1.37035	0.170578	+-+	46.9	0.5482	769	0.487	0.626	NA	NA	NA	NA	0.7746	35200	1.427	0.1535	++?	0
putamen	brainstem	rs2410767	5	87705268	c	g	0.7825	28809	-3.03886	0.00237476	---	0	0.6121	85	0.16	0.8726	NA	NA	NA	NA	0.782	28894	-3.026	0.002481	-+?	0
putamen	caudate	rs2410767	5	87705268	c	g	0.7759	37741	4.45202	8.51e-06	+++	0	0.5482	769	-0.468	0.6395	NA	NA	NA	NA	0.7714	38510	4.341	1.42e-05	+-?	16.3
putamen	pallidum	rs2410767	5	87705268	c	g	0.7797	34413	0.82119	0.411538	+++	0	0.5482	769	-0.12	0.9041	NA	NA	NA	NA	0.7746	35182	0.794	0.427	+-?	0
putamen	putamen	rs2410767	5	87705268	c	g	0.776	37571	5.88465	3.99e-09	+++	0	0.5482	769	0.461	0.6451	NA	NA	NA	NA	0.7714	38340	5.891	3.85e-09	++?	0
putamen	thalamus	rs2410767	5	87705268	c	g	0.7797	34464	0.805779	0.42037	+-+	34.9	0.5482	769	0.945	0.3448	NA	NA	NA	NA	0.7746	35233	0.937	0.349	++?	0
putamen	accumbens	rs1187162	11	92011126	t	c	0.4171	32562	-1.3888	0.164895	---	0	0.1993	85	-0.352727	0.7243	0.5641	341	-1.015	0.3103	0.4181	32988	-1.501	0.1334	---	0
putamen	amygdala	rs1187162	11	92011126	t	c	0.4174	34431	-0.186367	0.852157	+-+	0	0.261	769	1.031	0.3024	0.5641	341	-1.119	0.263	0.4154	35541	-0.141	0.8876	-+-	14.2
putamen	brainstem	rs1187162	11	92011126	t	c	0.4182	28809	1.4244	0.15433	+-+	44.7	0.1993	85	0.845	0.3982	0.5641	341	-0.596	0.5515	0.4193	29235	1.395	0.1629	++-	0
putamen	caudate	rs1187162	11	92011126	t	c	0.4166	37741	-6.89345	5.45e-12	---	72.2	0.261	769	-0.006	0.9955	0.5641	341	-1.928	0.0539	0.4148	38851	-6.976	3.05e-12	---	22.4
putamen	pallidum	rs1187162	11	92011126	t	c	0.4175	34413	0.749523	0.453542	+++	0	0.261	769	-1.193	0.2329	0.5641	341	-1.156	0.2476	0.4155	35523	0.449	0.6535	+--	35.9
putamen	putamen	rs1187162	11	92011126	t	c	0.4166	37571	5.8427	5.14e-09	+++	0	0.261	769	0.805	0.421	0.5641	341	-2.54	0.01108	0.4148	38681	5.633	1.77e-08	++-	79
putamen	thalamus	rs1187162	11	92011126	t	c	0.4175	34464	2.66046	0.00780338	+++	0	0.261	769	-0.035	0.9721	0.5641	341	-0.09	0.9281	0.4155	35574	2.605	0.009197	+--	0
thalamus	accumbens	rs12600720	17	78448640	c	g	0.6861	31121	2.19644	0.0280603	++-	5.5	NA	NA	NA	NA	0.6207	341	-0.038	0.9697	0.6854	31462	2.181	0.02922	+?-	0
thalamus	amygdala	rs12600720	17	78448640	c	g	0.686	32990	1.84175	0.0655119	++-	48.6	0.894	684	-0.932	0.3513	0.6207	341	-1.313	0.1891	0.6895	34015	1.55	0.1211	+--	44.2
thalamus	brainstem	rs12600720	17	78448640	c	g	0.6873	27369	0.267261	0.789268	-++	0	NA	NA	NA	NA	0.6207	341	1.248	0.2119	0.6865	27710	0.404	0.6861	+?+	31.8
thalamus	caudate	rs12600720	17	78448640	c	g	0.686	33001	0.500172	0.616954	+++	0	0.894	684	1.296	0.195	0.6207	341	1.239	0.2152	0.6895	34026	0.8	0.4235	+++	29.2
thalamus	pallidum	rs12600720	17	78448640	c	g	0.6861	32972	2.2197	0.026439	+++	18.5	0.894	684	1.222	0.2218	0.6207	341	1.409	0.1587	0.6896	33997	2.5	0.0124	+++	7.2
thalamus	putamen	rs12600720	17	78448640	c	g	0.6861	32993	1.26242	0.206797	+++	0	0.894	684	0.602	0.5471	0.6207	341	0.369	0.712	0.6896	34018	1.366	0.1721	+++	0
thalamus	thalamus	rs12600720	17	78448640	c	g	0.686	33023	6.25174	4.06e-10	+++	0	0.894	684	1.048	0.2947	0.6207	341	1.216	0.224	0.6895	34048	6.427	1.3e-10	+++	0
thalamus	accumbens	rs142461330	7	55012097	t	c	0.9199	32283	0.234446	0.814639	+-+	1.2	NA	NA	NA	NA	NA	NA	NA	NA	0.9199	32283	0.234	0.8146	+??	0
thalamus	amygdala	rs142461330	7	55012097	t	c	0.9193	34152	-2.08393	0.0371668	--+	47.3	NA	NA	NA	NA	NA	NA	NA	NA	0.9193	34152	-2.084	0.03717	-??	0
thalamus	brainstem	rs142461330	7	55012097	t	c	0.9213	28530	-4.11582	3.86e-05	---	0	NA	NA	NA	NA	NA	NA	NA	NA	0.9213	28530	-4.116	3.86e-05	-??	0
thalamus	caudate	rs142461330	7	55012097	t	c	0.919	37462	1.01718	0.309067	+-+	38.4	NA	NA	NA	NA	NA	NA	NA	NA	0.919	37462	1.017	0.3091	+??	0
thalamus	pallidum	rs142461330	7	55012097	t	c	0.9193	34134	0.165233	0.86876	+--	47.8	NA	NA	NA	NA	NA	NA	NA	NA	0.9193	34134	0.165	0.8688	+??	0
thalamus	putamen	rs142461330	7	55012097	t	c	0.9191	37453	-0.019975	0.984063	+--	51.5	NA	NA	NA	NA	NA	NA	NA	NA	0.9191	37453	-0.02	0.9841	-??	0
thalamus	thalamus	rs142461330	7	55012097	t	c	0.9193	34185	-5.89747	3.69e-09	---	0	NA	NA	NA	NA	NA	NA	NA	NA	0.9193	34185	-5.897	3.69e-09	-??	0
a Linear regression models were adjusted for sex, age, age², total intracranial volume (CHARGE) or total brain volume (UKBB) and population stratification. Shaded rows indicate significant findings in Europeans after additional Bonferroni correction for six independent traits (P <5 x 10-8/6 = 8.3 × 10-9, two-sided). In bold, nominally significant results other than discovery findings (two-sided)
b European sample size: nucleus accumbens = 32,562; amygdala = 34,431; brainstem = 28,809; caudate = 37,741; pallidum = 34,413; putamen = 37,571; thalamus = 34,464
c Generalization sample of African-American from the ARIC, CHS and GeneStar. Sample size: nucleus accumbens and brainstem = 85; amygdala, caudate, pallidum, putamen and thalamus = 769
d Generalization sample of Asian (Chinese and Malay) descent from EDIS-SCES and EDIS-SIMES. Sample size for all subcortical structures = 341
e Full meta-analysis sample size: nucleus accumbens = 32,988; amygdala = 35,541; brainstem = 29,235; caudate = 38,851; pallidum = 35,523; putamen = 38,681; thalamus = 35,574
f Direction of association: CHARGE, ENIGMA, UKBB
g Direction of association: Discovery (European), Generalization 1 (African-American), Generalization 2 (Asian)

## Sheet: Supplementary Table 8
Supplementary Table 8. Binomial sign test of concordance for the direction of effect across ethnic groups
Structure	N		EUR & ASN				EUR & AFR				EUR, ASN, AFR
	SNPsa		r	Prop.	P		r	Prop.	P		Prop.	P
Nucleus accumbens	333		0.37	67.1	1.7e-05		0.31	63.6	0.0017		40.2	0.00042
Amygdala	284		0.54	75.6	1.9e-08		0.59	73.9	1.8e-10		53.9	3.7e-11
Brainstem	438		0.45	71.3	5.5e-12		0.28	65.3	5.9e-06		48.3	8.8e-13
Caudate nucleus	507		0.34	67.4	5.4e-09		0.57	78.3	3.1e-28		49.5	5.3e-18
Globus pallidus	339		0.48	72	1.8e-08		0.59	82.6	1.6e-23		58.4	1.5e-18
Putamen	466		0.34	66.1	3.5e-07		0.6	77.4	3.6e-23		49.6	5.3e-16
Thalamus	397		0.25	64.3	0.00022		0.61	78.4	1.9e-19		51.5	3.6e-13
a Clumped variants (r2<0.05) meeting the P<1E-4 threshold of association in the European sample (nucleus accumbens = 32,562; amygdala = 34,431; brainstem = 28,809; caudate = 37,741; pallidum = 34,413; putamen = 37,571; thalamus = 34,464)
EUR: European descent; ASN: Asian descent; AFR: African descent

[truncated: 13 more sheets: Supplementary Table 9, Supplementary Table 10, Supplementary Table 11, Supplementary Table 12, Supplementary Table 13, Supplementary Table 14, Supplementary Table 15, Supplementary Table 16, Supplementary Table 17, Supplementary Table 18, Supplementary Table 19, Supplementary Table 20, Supplementary Table 21]
